# Supplementary material for: Polymerizable phosphoramidites with an acid-cleavable linker for eco-friendly synthetic oligodeoxynucleotide purification
Source: Royal Society of Chemistry journal article supplement (doi:10.1039/c5gc01762a), 2015-09-24
Supplement: c5gc01762a1.pdf [file c5gc01762a1.pdf]

Electronic Supporting Information

**Polymerizable Phosphoramidites with Acid-Cleavable Linker for Eco-Friendly Synthetic  
Oligodeoxynucleotide Purification**

Durga Pokharel, Shiyue Fang\*

*Department of Chemistry, Michigan Technological University, 1400 Townsend Drive, Houghton,  
MI 49931 USA*

*Email: shifang@mtu.edu*

**Table of contents**

|                             |    |
|-----------------------------|----|
| RP HPLC profiles .....      | 2  |
| NMR spectra .....           | 13 |
| MS of small molecules ..... | 41 |
| MS of ODNs .....            | 47 |
| Purification protocol ..... | 51 |

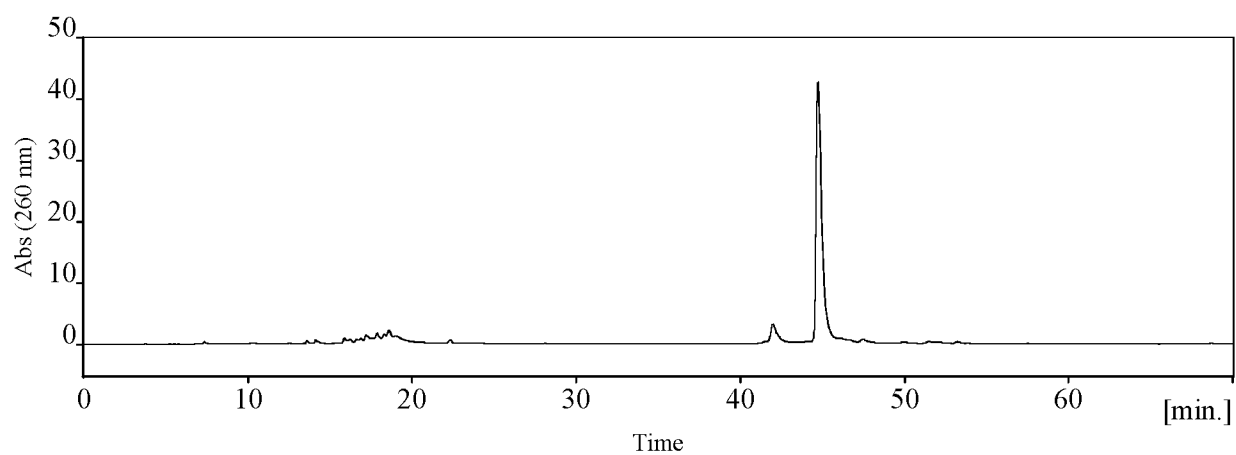

Crude RP HPLC profile of the 20-mer ODN 7.

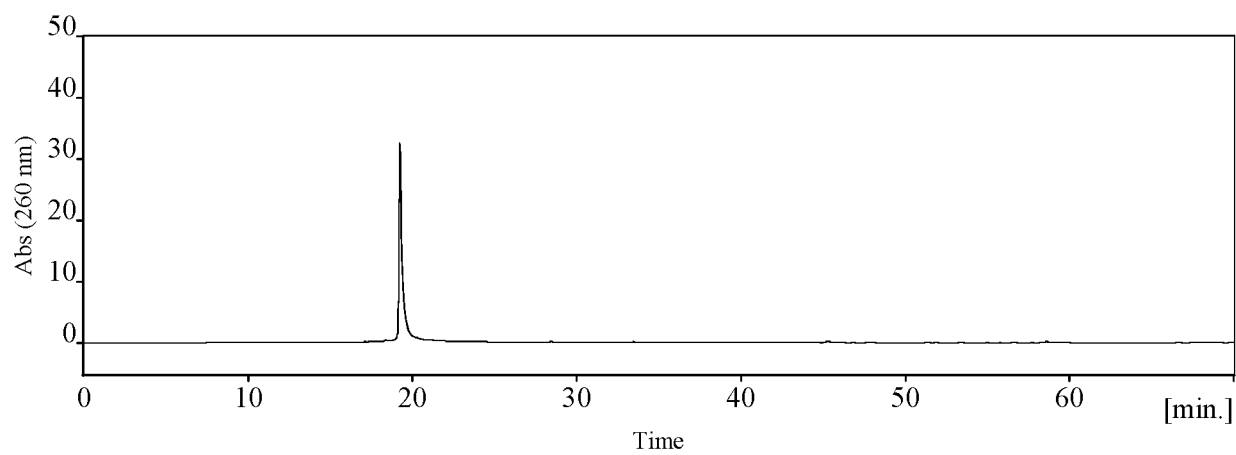

Pure RP HPLC profile of the 20-mer ODN 7.

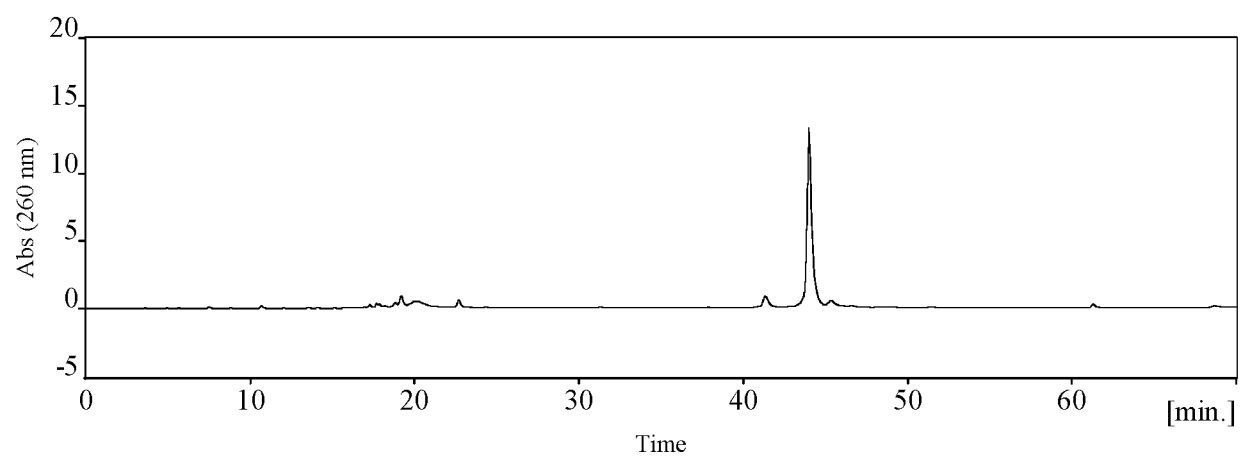

Crude RP HPLC profile of the 31-mer ODN **8**.

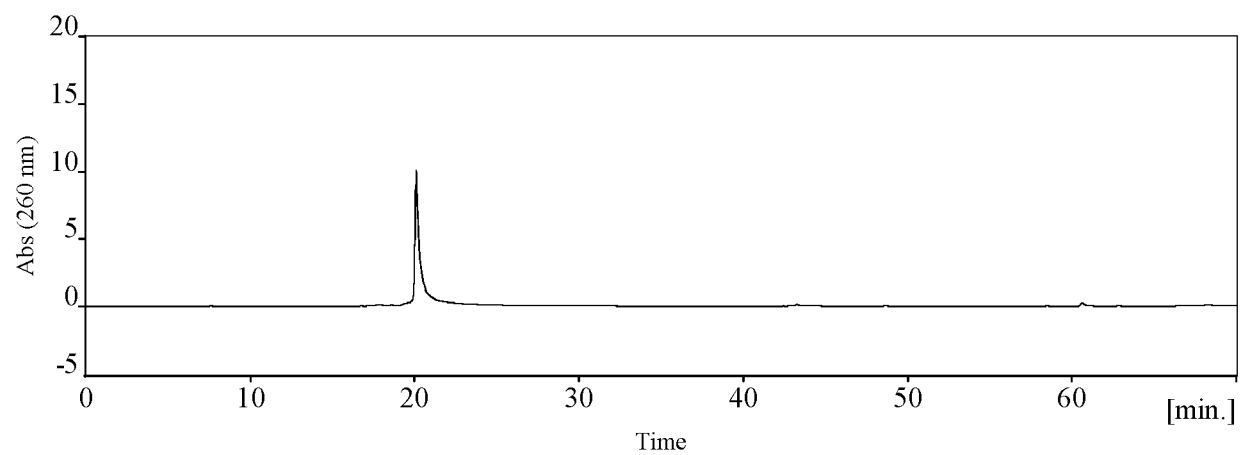

Pure RP HPLC profile of the 31-mer ODN **8**.

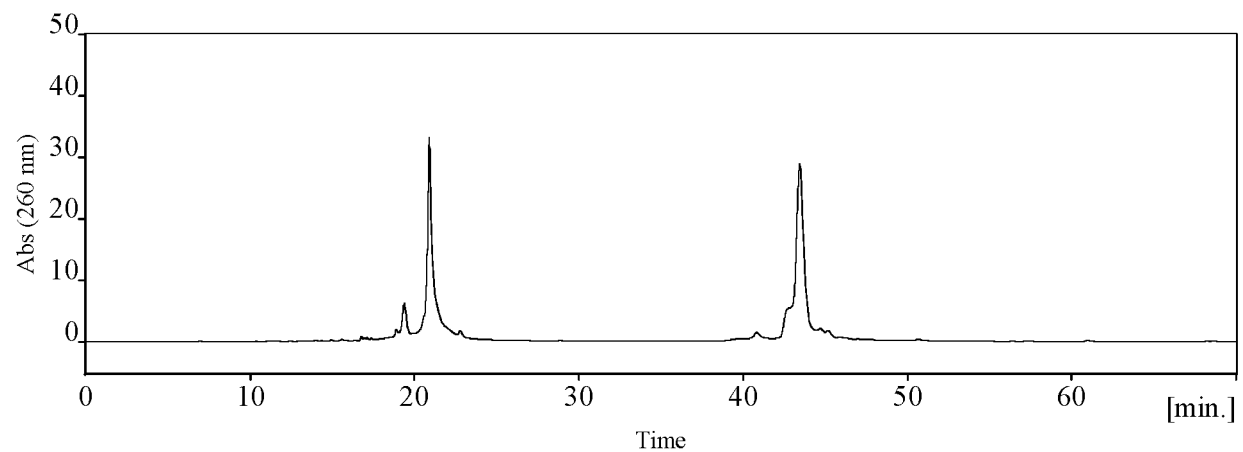

Crude RP HPLC profile of 37-mer ODN 9.

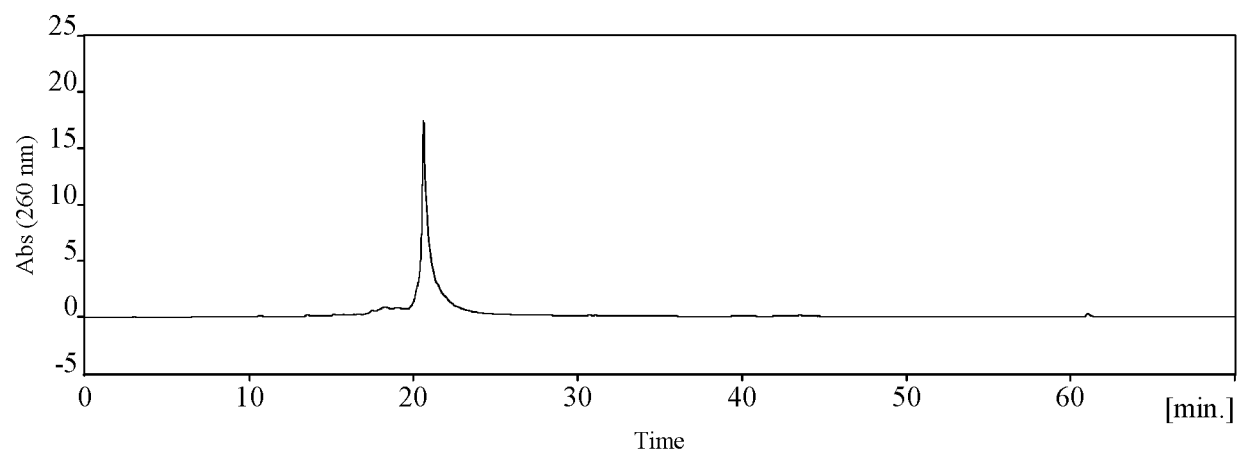

Pure RP HPLC profile of 37-mer ODN 9

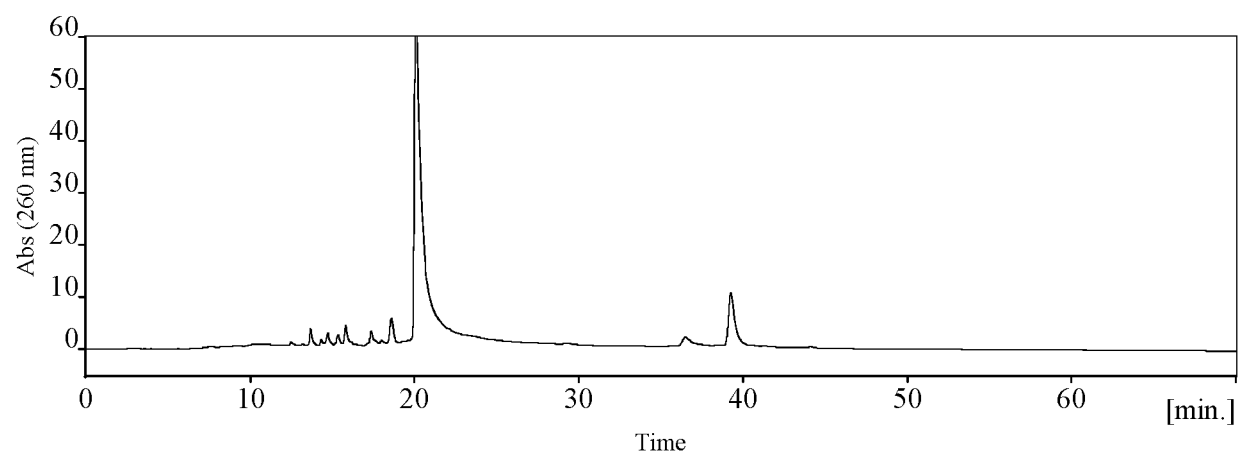

Crude RP HPLC profile of 43-mer ODN **10**.

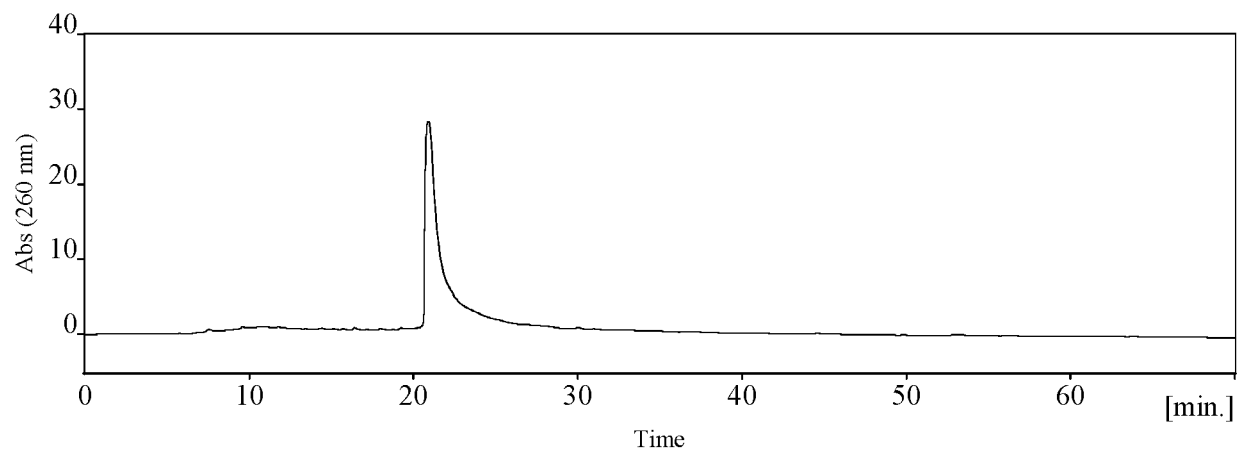

Pure RP HPLC profile of 43-mer ODN **10**.

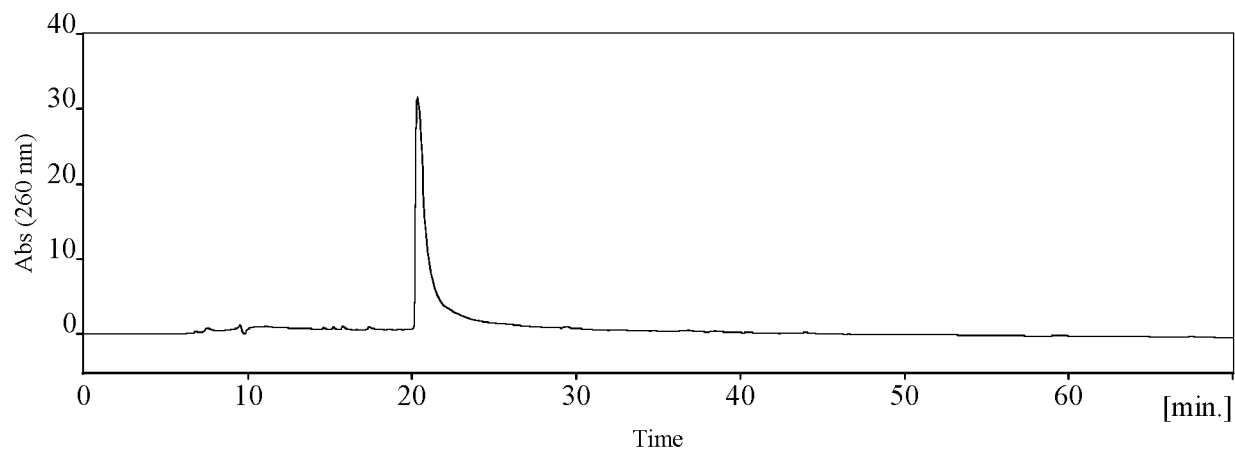

Pure RP HPLC profile of 43-mer ODN **10**. The reagent for cleaving ODN from polyacrylamide gel was changed from 80% AcOH to 0.1 mM Et<sub>3</sub>NHCl at pH 3.0.

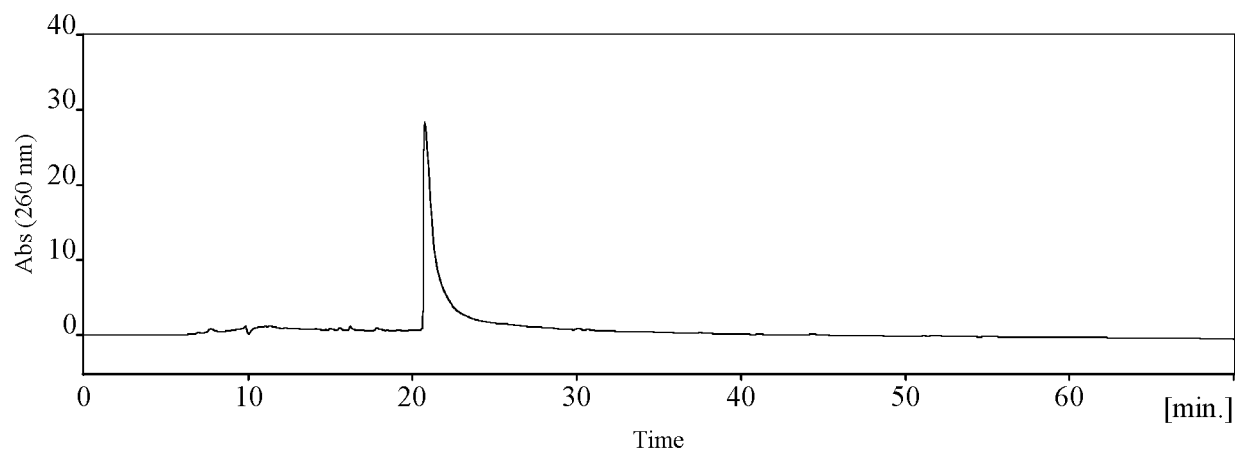

Pure RP HPLC profile of 43-mer ODN **10**. The reagent for cleaving ODN from polyacrylamide gel was changed from 80% AcOH to 10 mM Et<sub>3</sub>NHO<sub>2</sub>CCF<sub>3</sub> at pH 3.0.

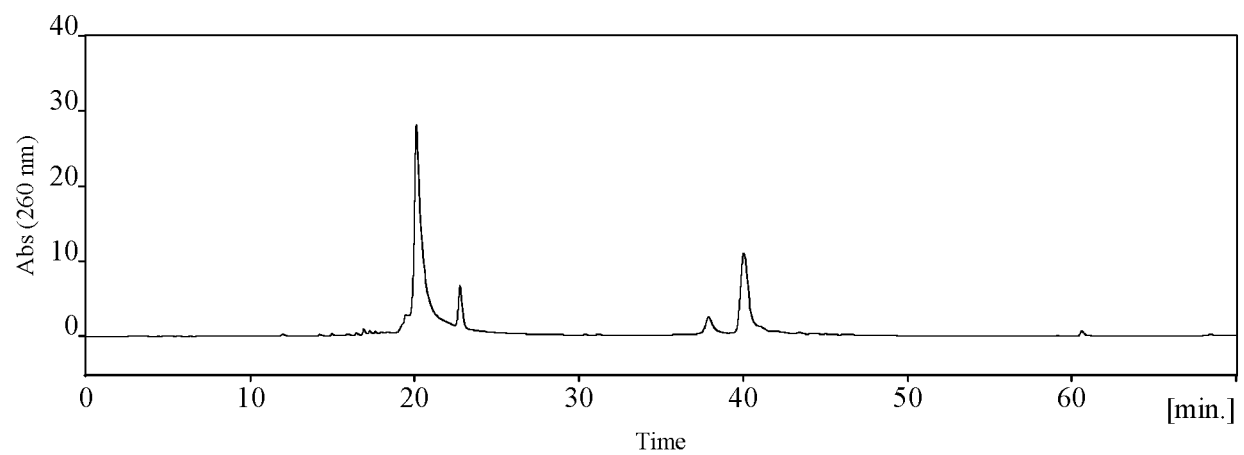

Crude RP HPLC profile of the 61-mer ODN 11.

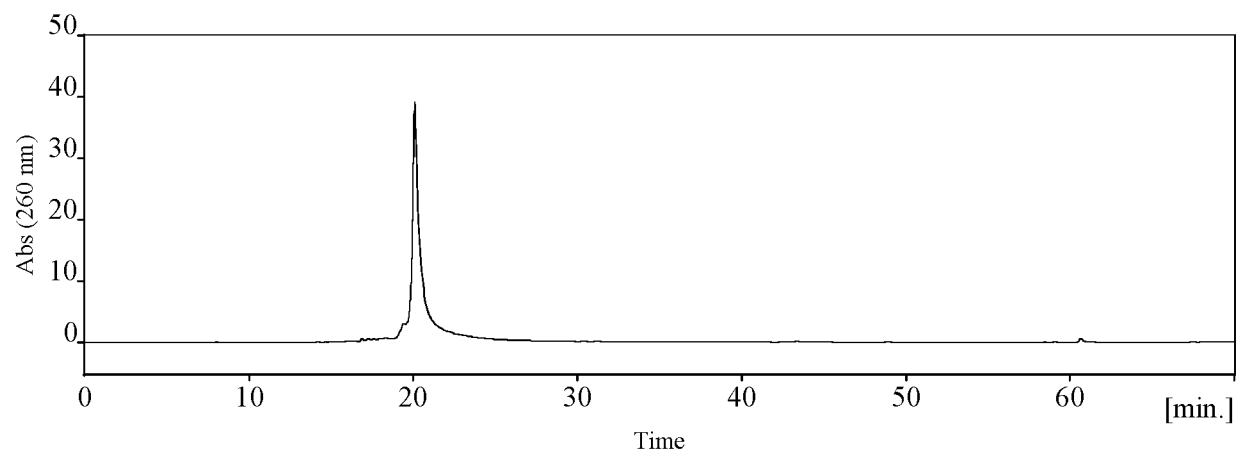

Pure RP HPLC profile of the 61-mer ODN 11.

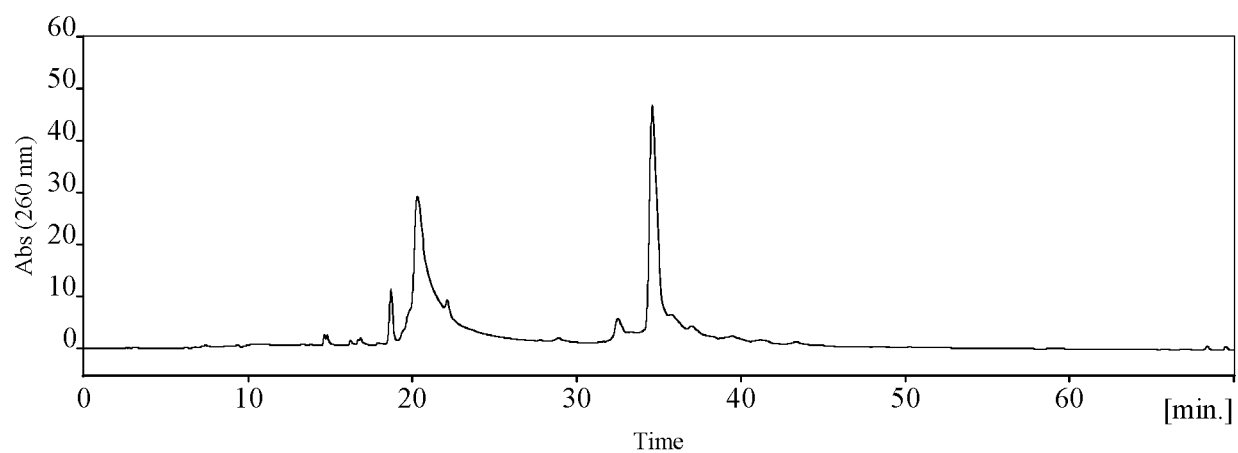

Crude RP HPLC profile of the 81-mer ODN **12**.

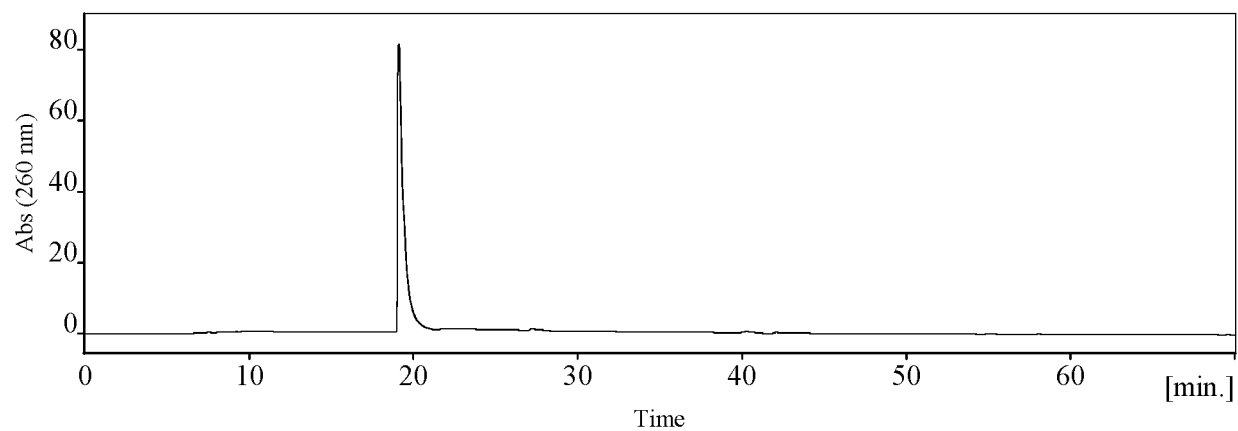

Pure RP HPLC profile of the 81-mer ODN **12**.



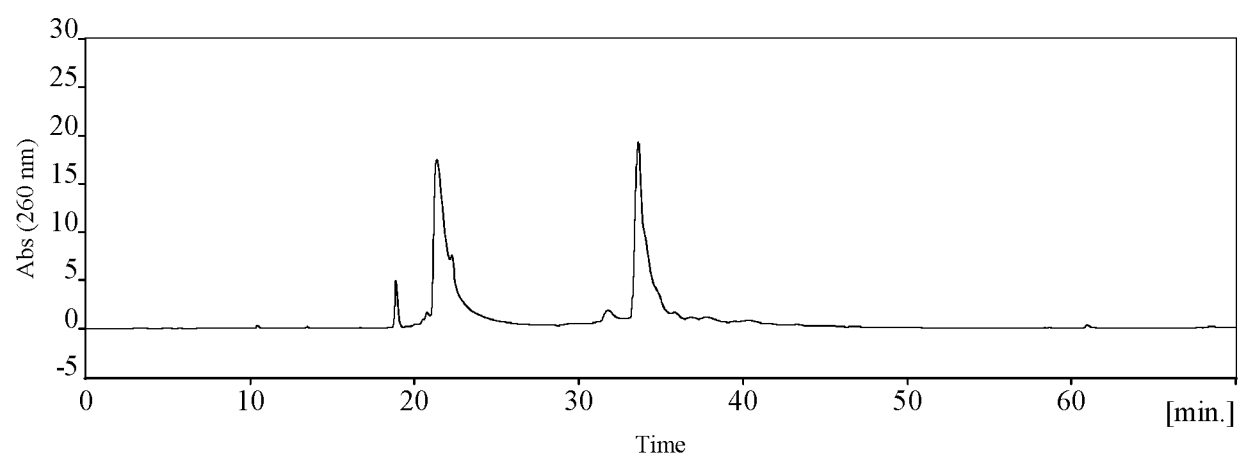

Crude RP HPLC profile of the 151-mer ODN **13**.

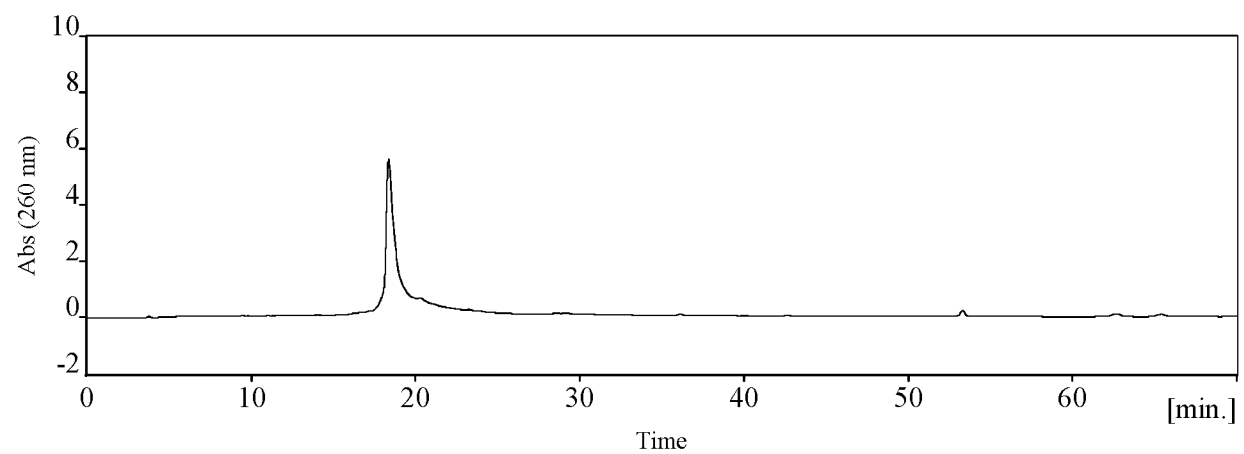

Pure RP HPLC profile of the 151-mer ODN **13**.

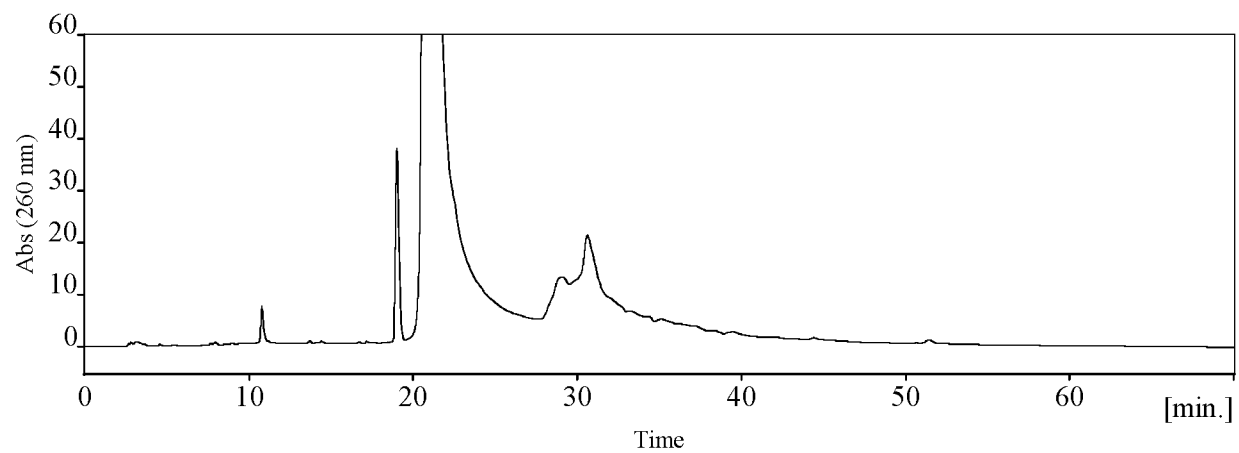

Crude RP HPLC profile of the 196-mer ODN **14**.

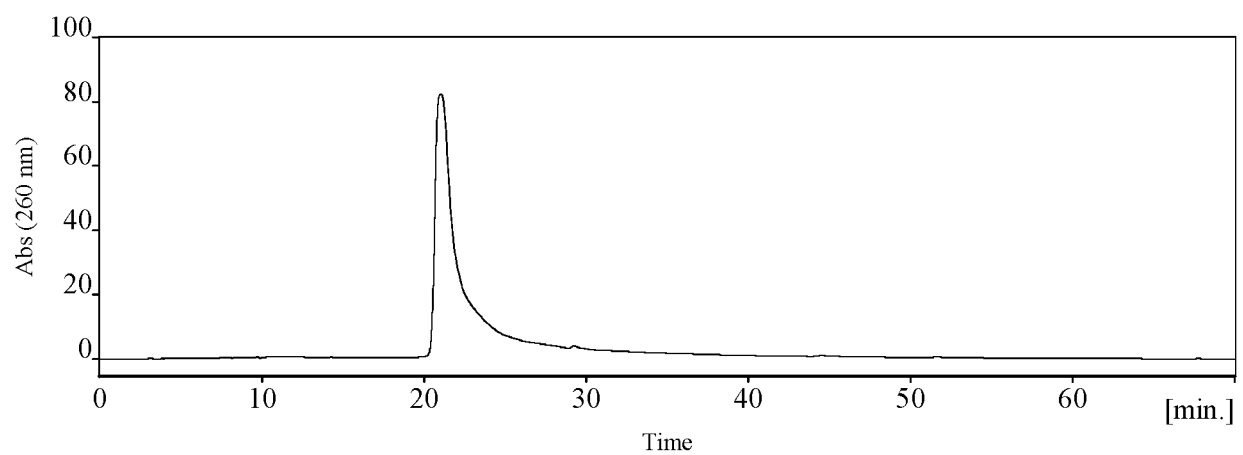

Pure RP HPLC profile of the 196-mer ODN **14**.

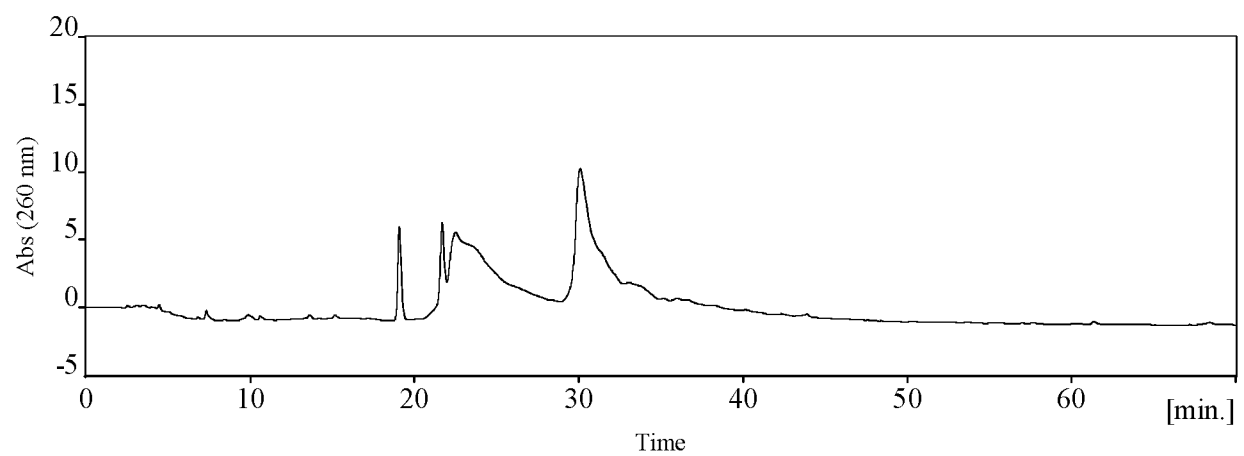

Crude RP HPLC profile of the 197-mer ODN **15**.

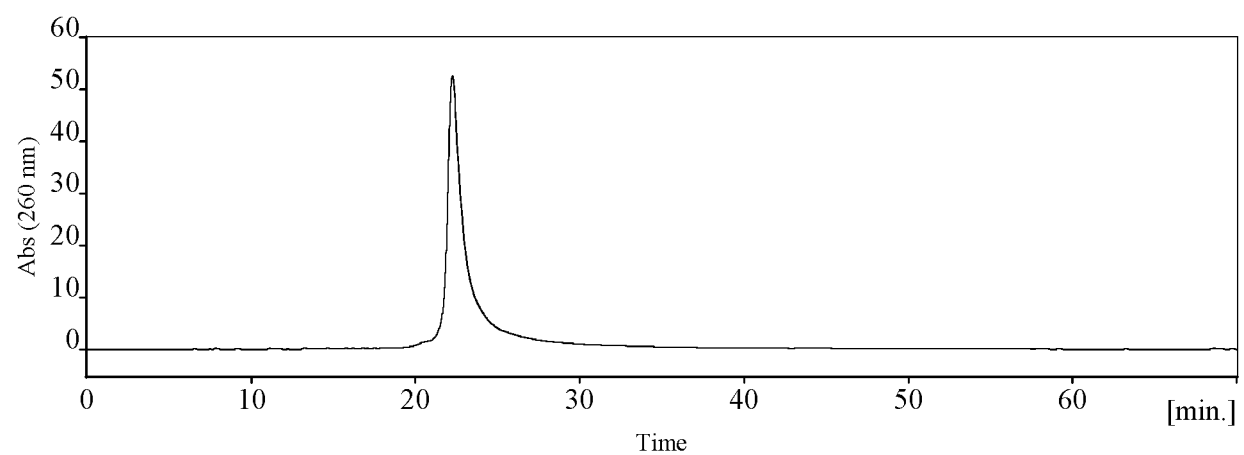

Pure RP HPLC profile of the 197-mer ODN **15**.

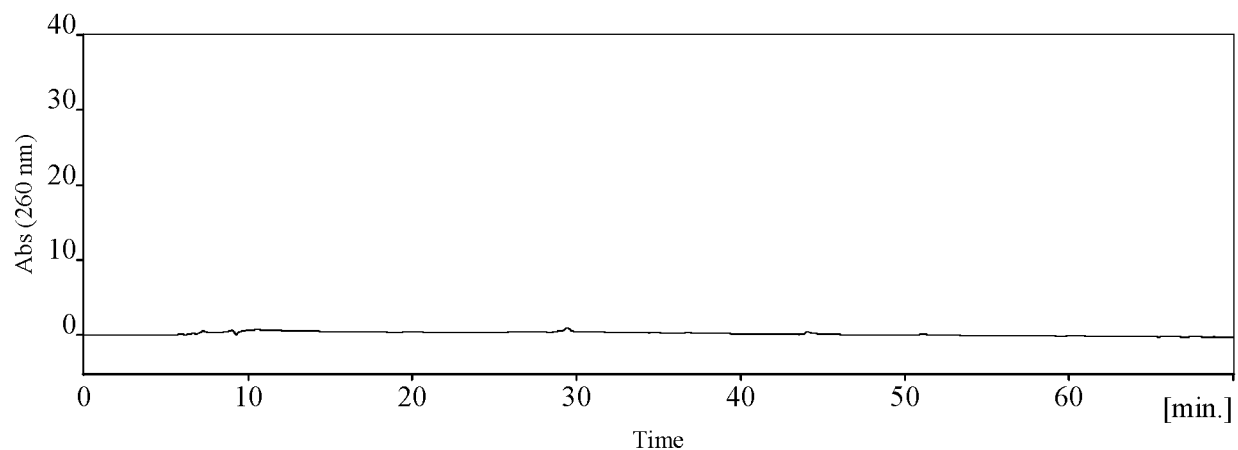

The RP HPLC profile of a blank control experiment. The procedure for the purification of ODN **15** was followed except that no crude DNA was introduced. The final residue was dissolved in 30  $\mu$ l water and 20  $\mu$ l was injected into HPLC. The result shows that the purification procedure does not introduce any UV active impurity.



$^{13}\text{C}$  NMR of compound **3** in  $\text{CDCl}_3$  at 100 MHz

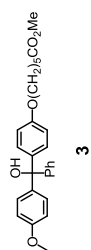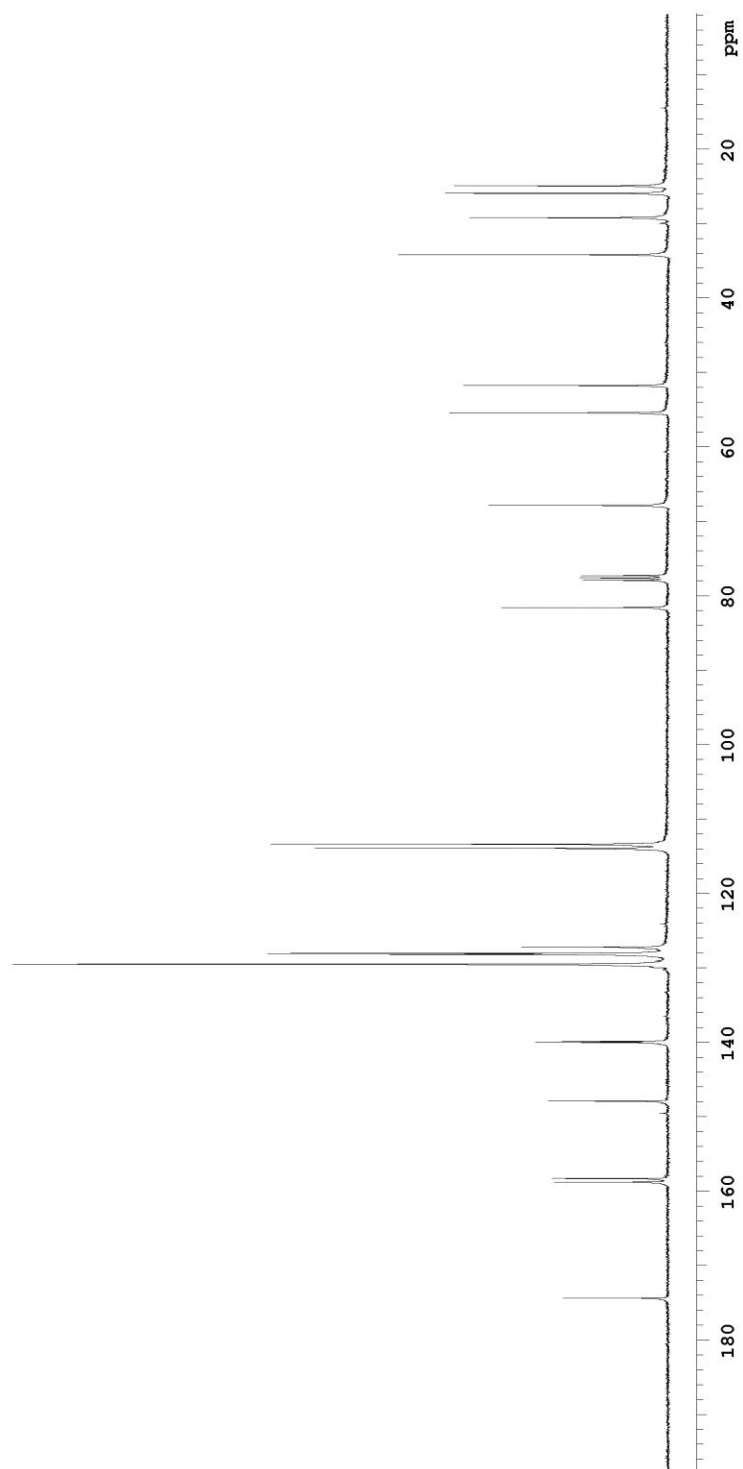

<sup>1</sup>H NMR of compound **4** in CDCl<sub>3</sub> at 400 MHz

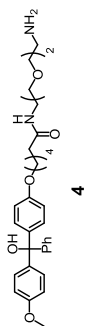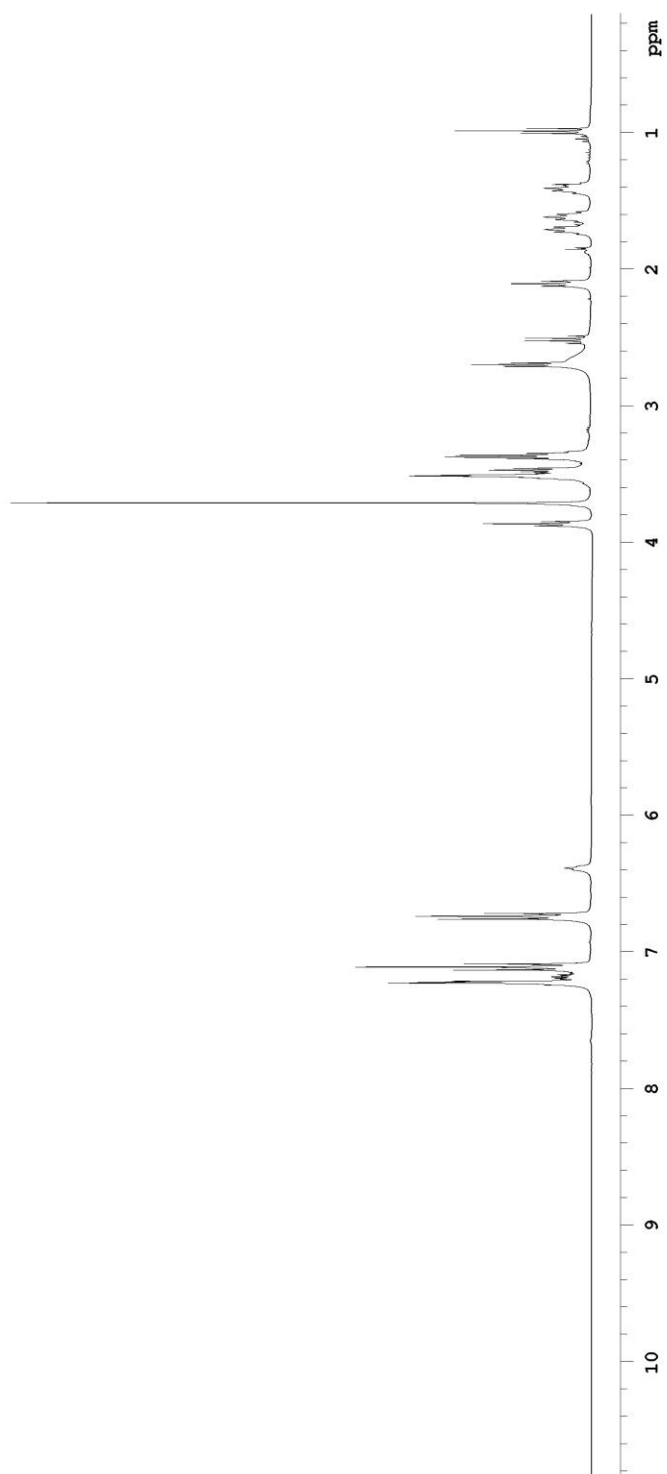





$^1\text{H}$  NMR of compound **5** in  $\text{CDCl}_3$  at 400 MHz

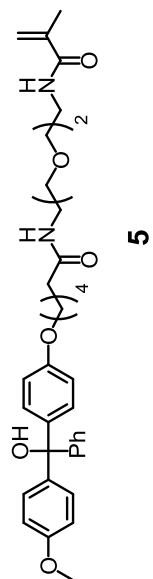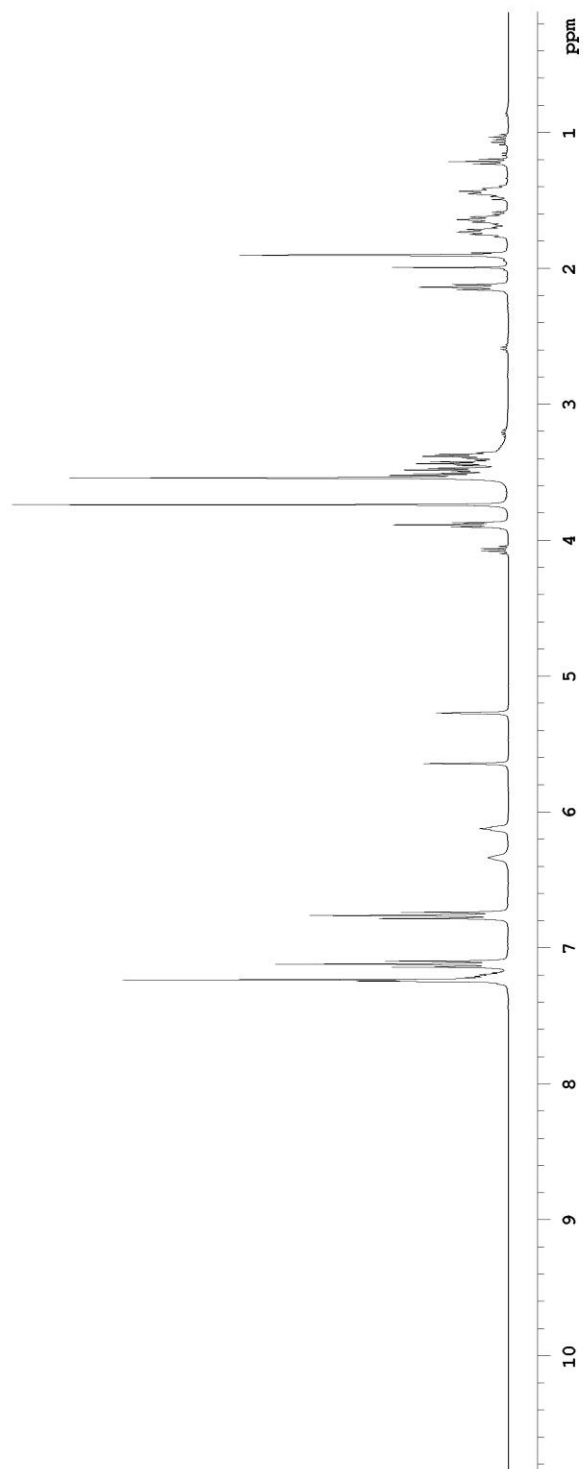

$^{13}\text{C}$  NMR of compound **5** in  $\text{CDCl}_3$  at 100 MHz

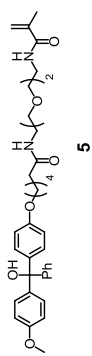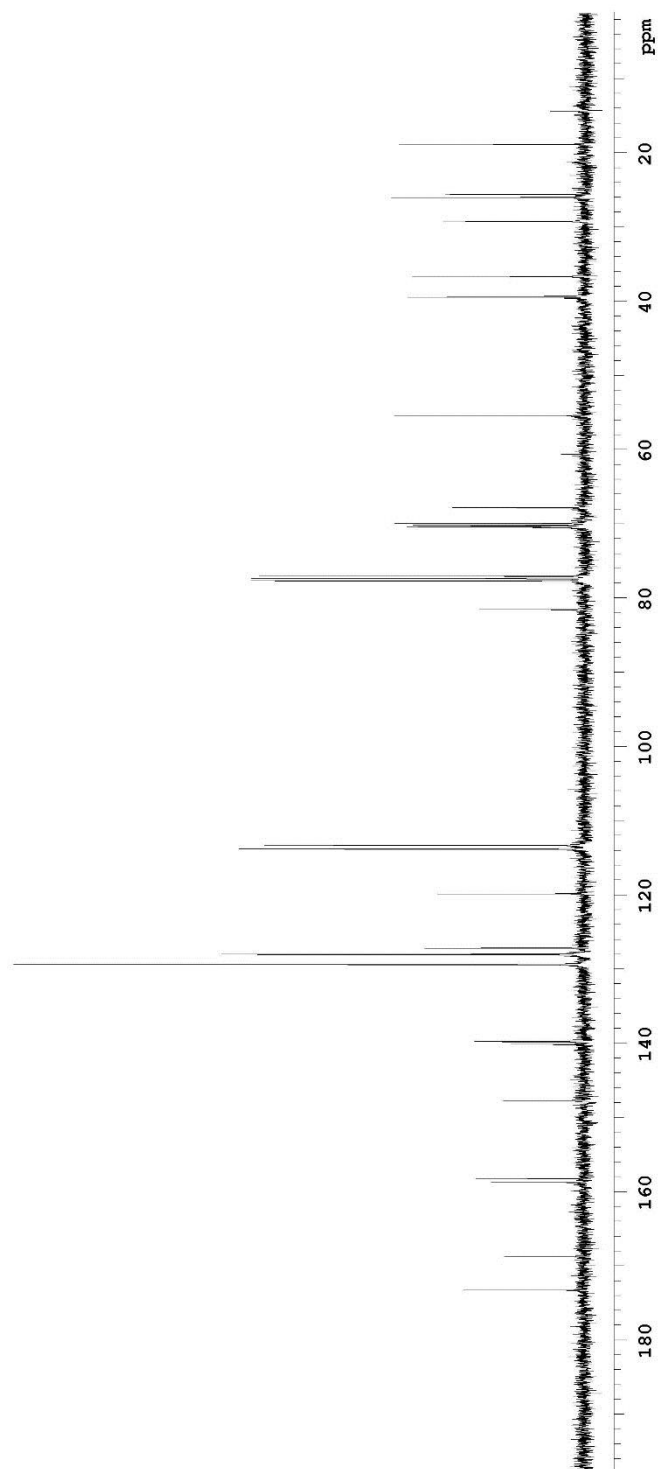

<sup>1</sup>H NMR of compound **6a** in acetone-d<sub>6</sub> at 400 MHz

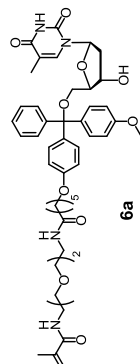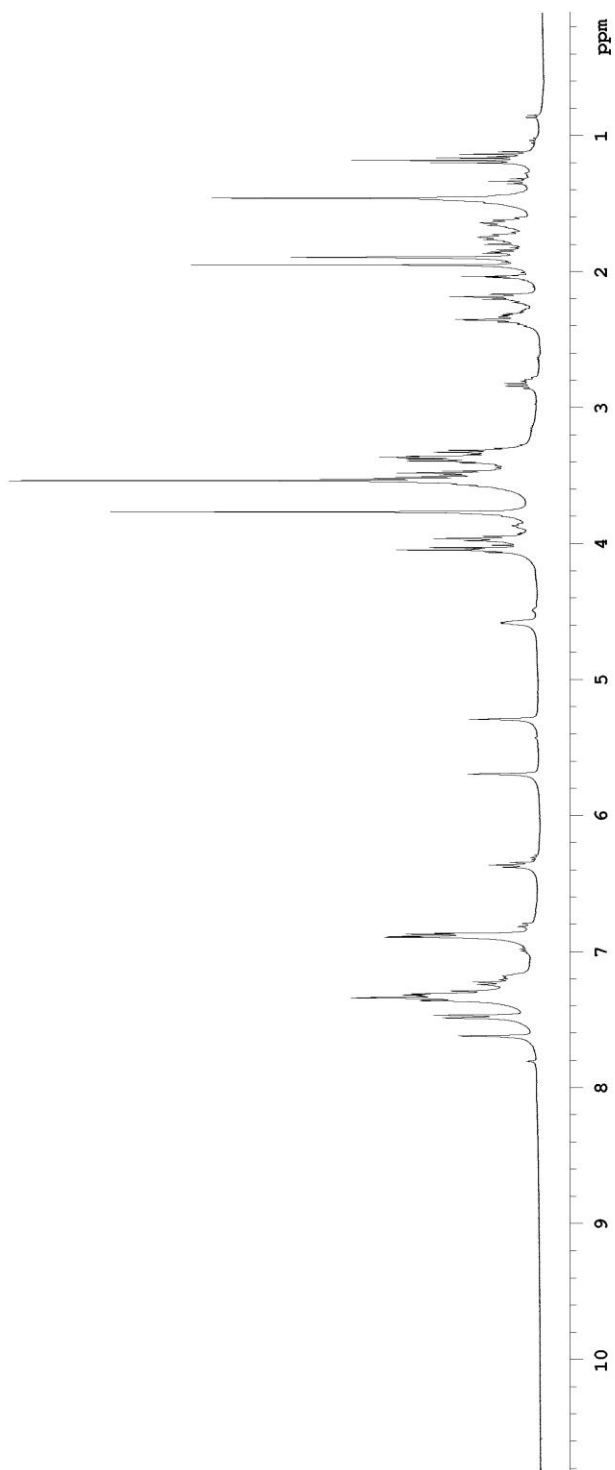

<sup>13</sup>C NMR of compound **6a** in acetone-d<sub>6</sub> at 100 MHz

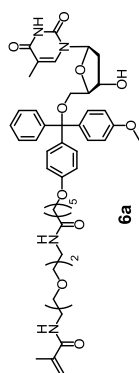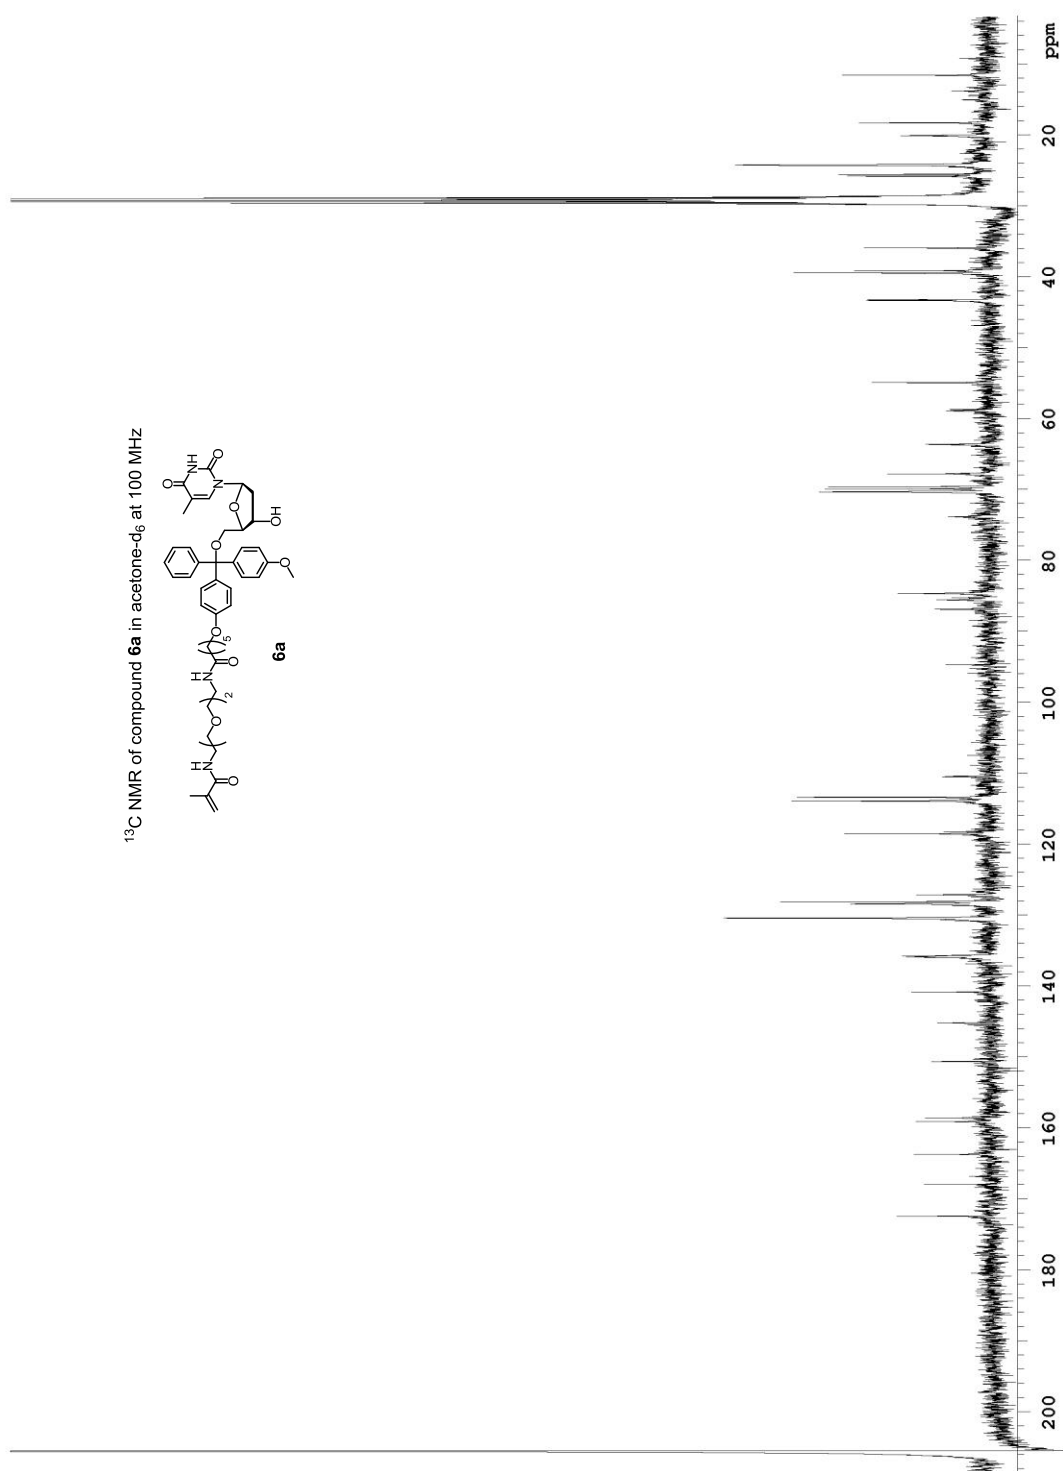

$^1\text{H}$  NMR of **6b** in acetone- $d_6$  at 400 MHz

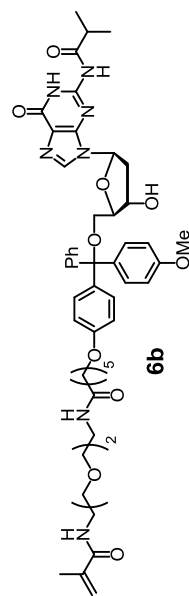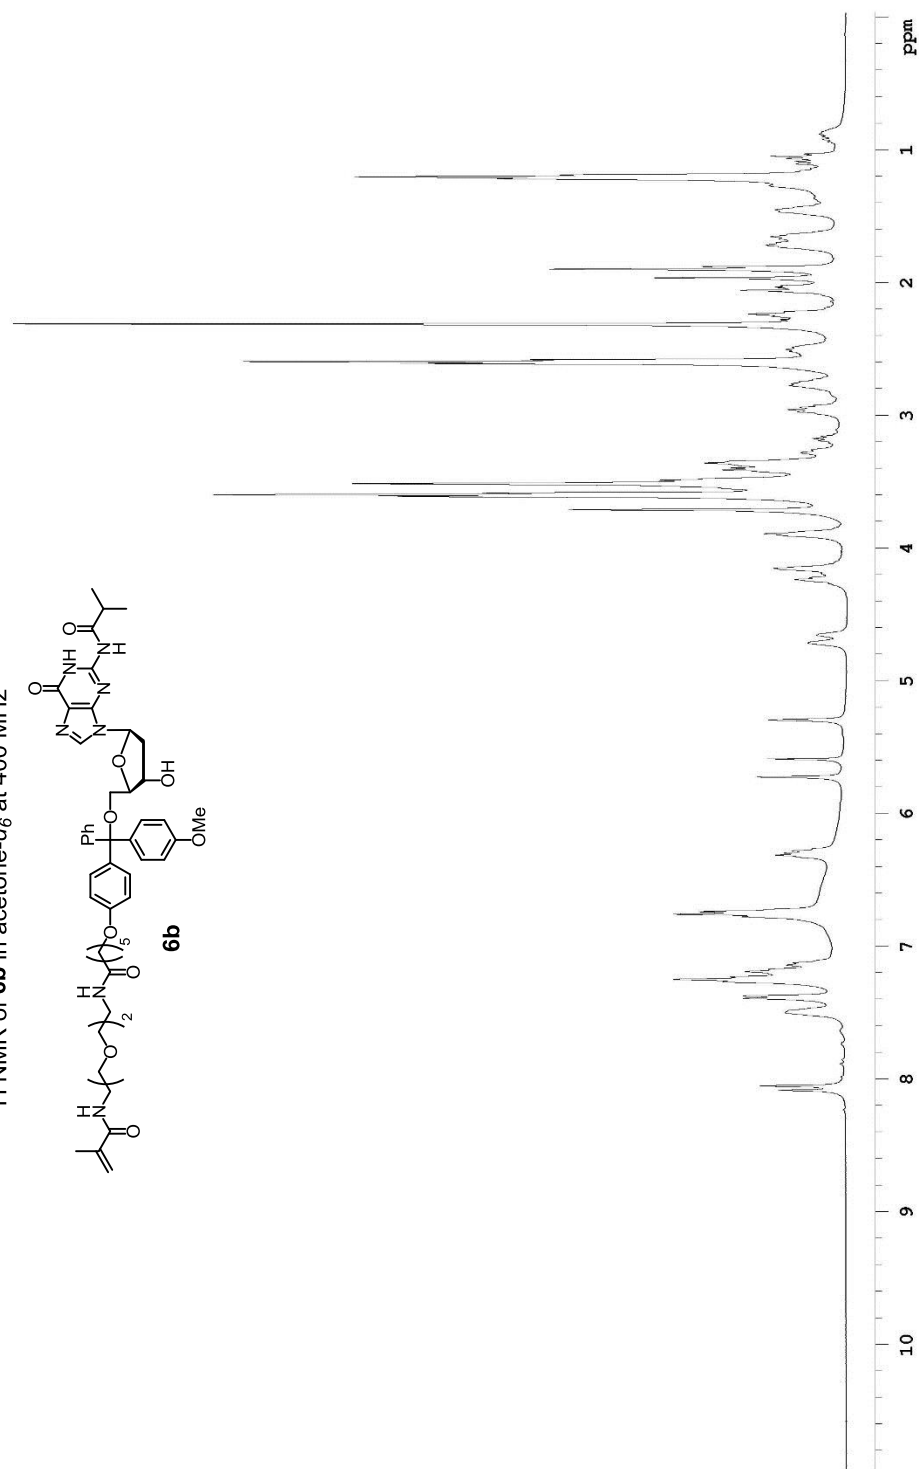

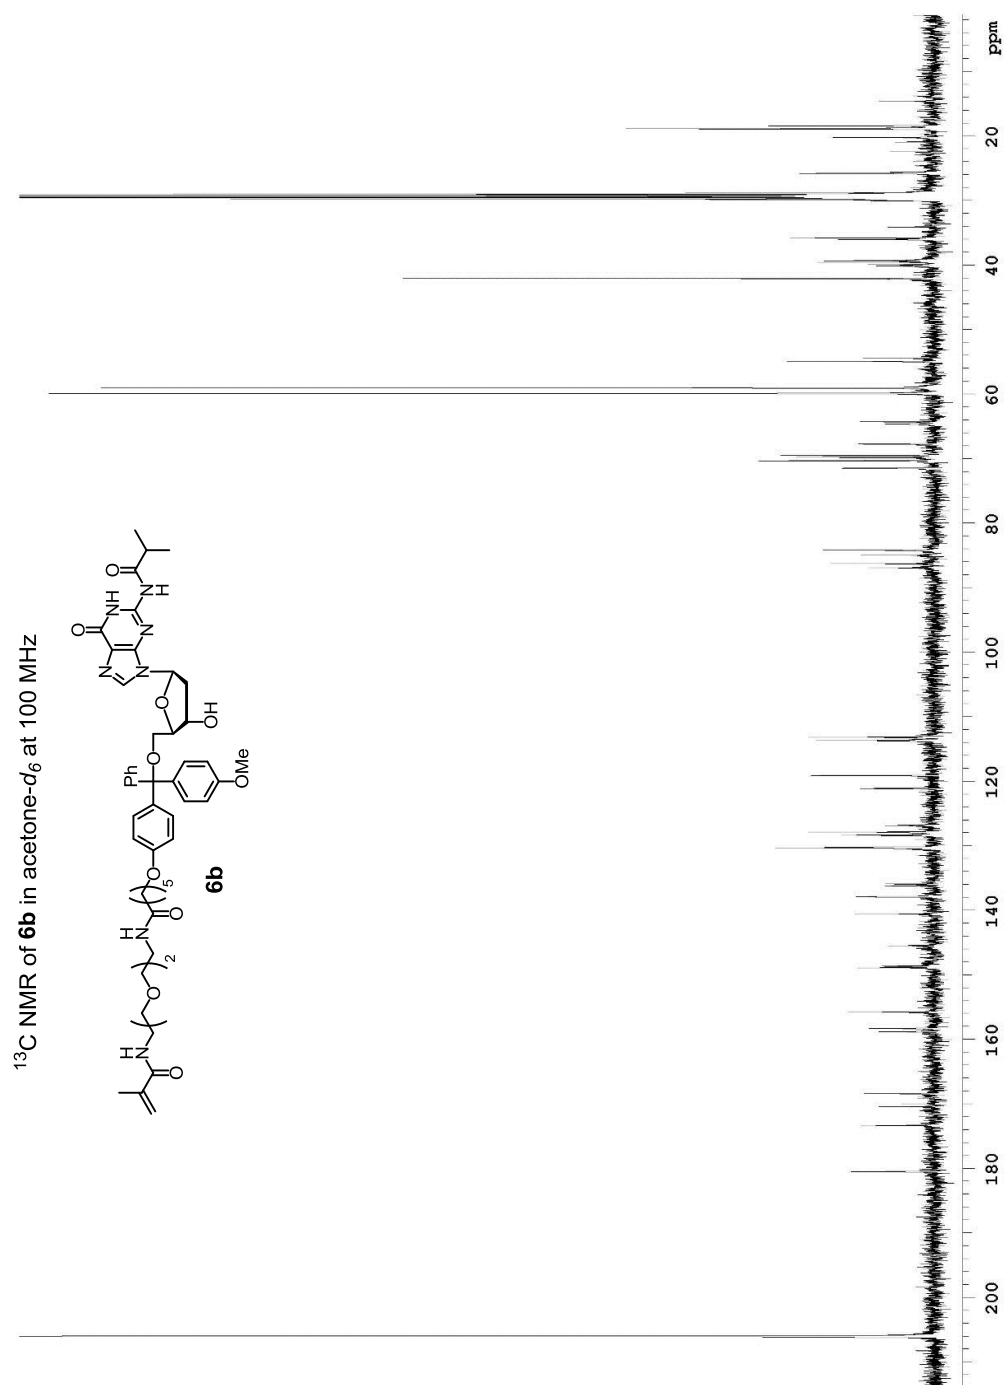

$^1\text{H}$  NMR of **6c** in acetone- $d_6$  at 400 MHz

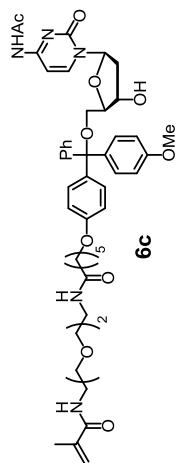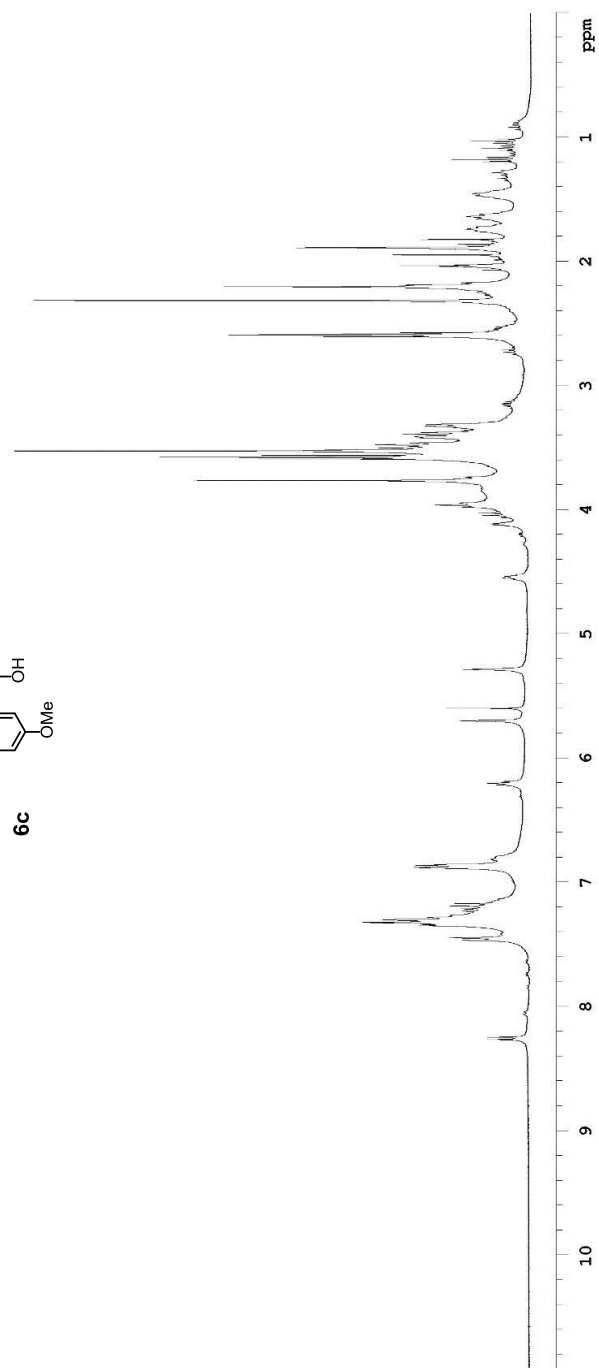

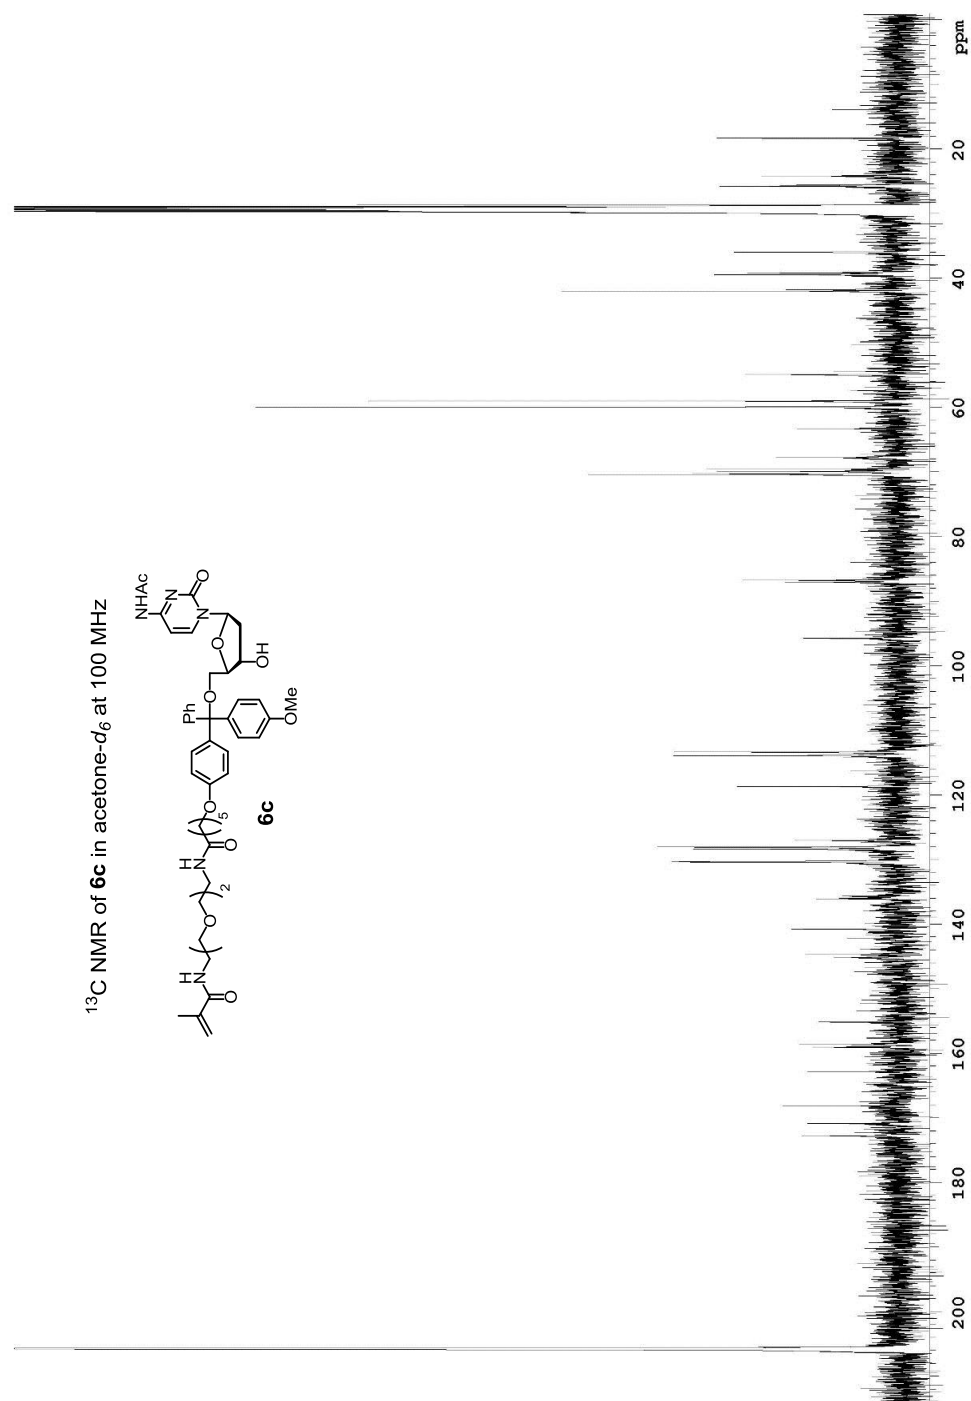



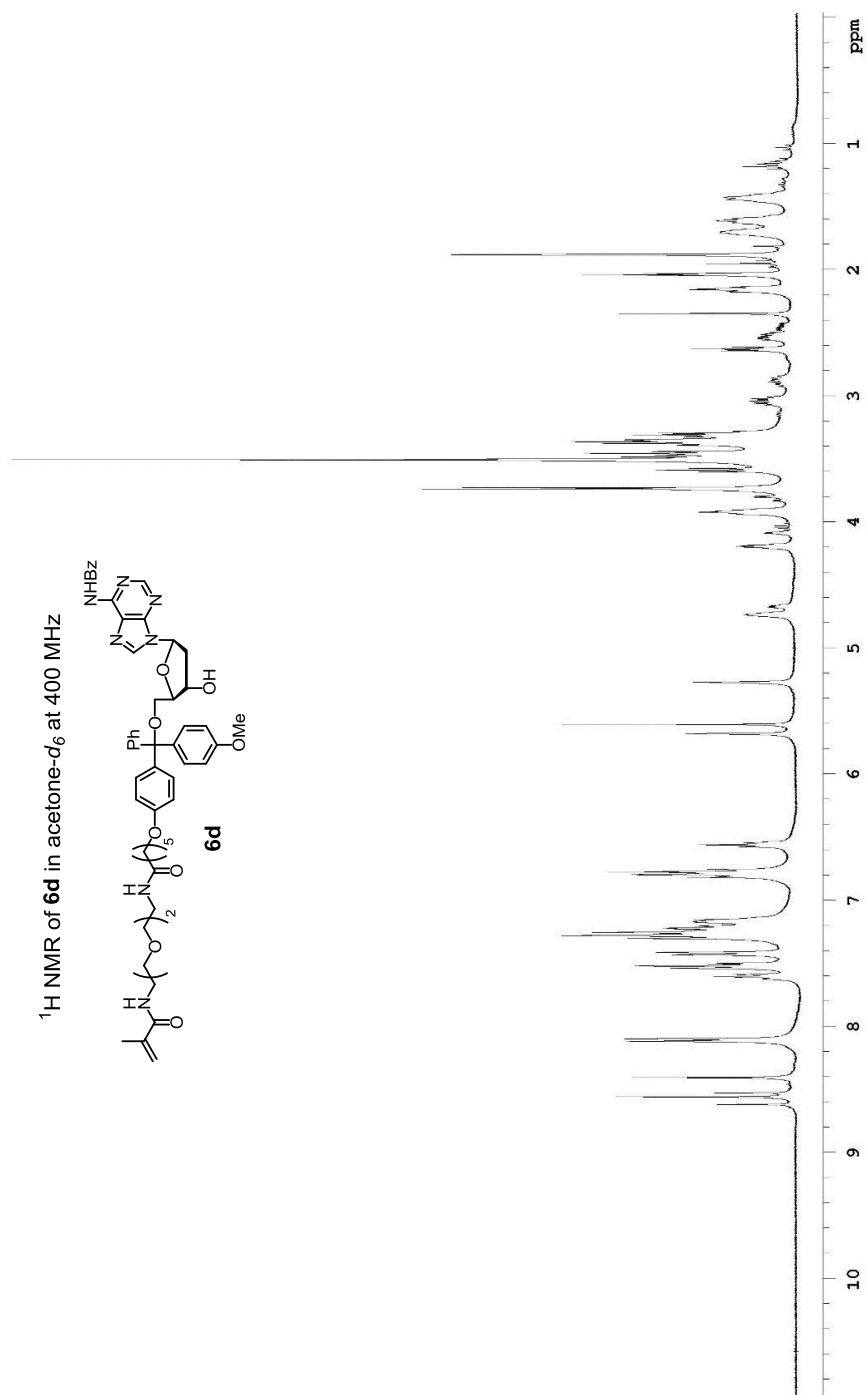

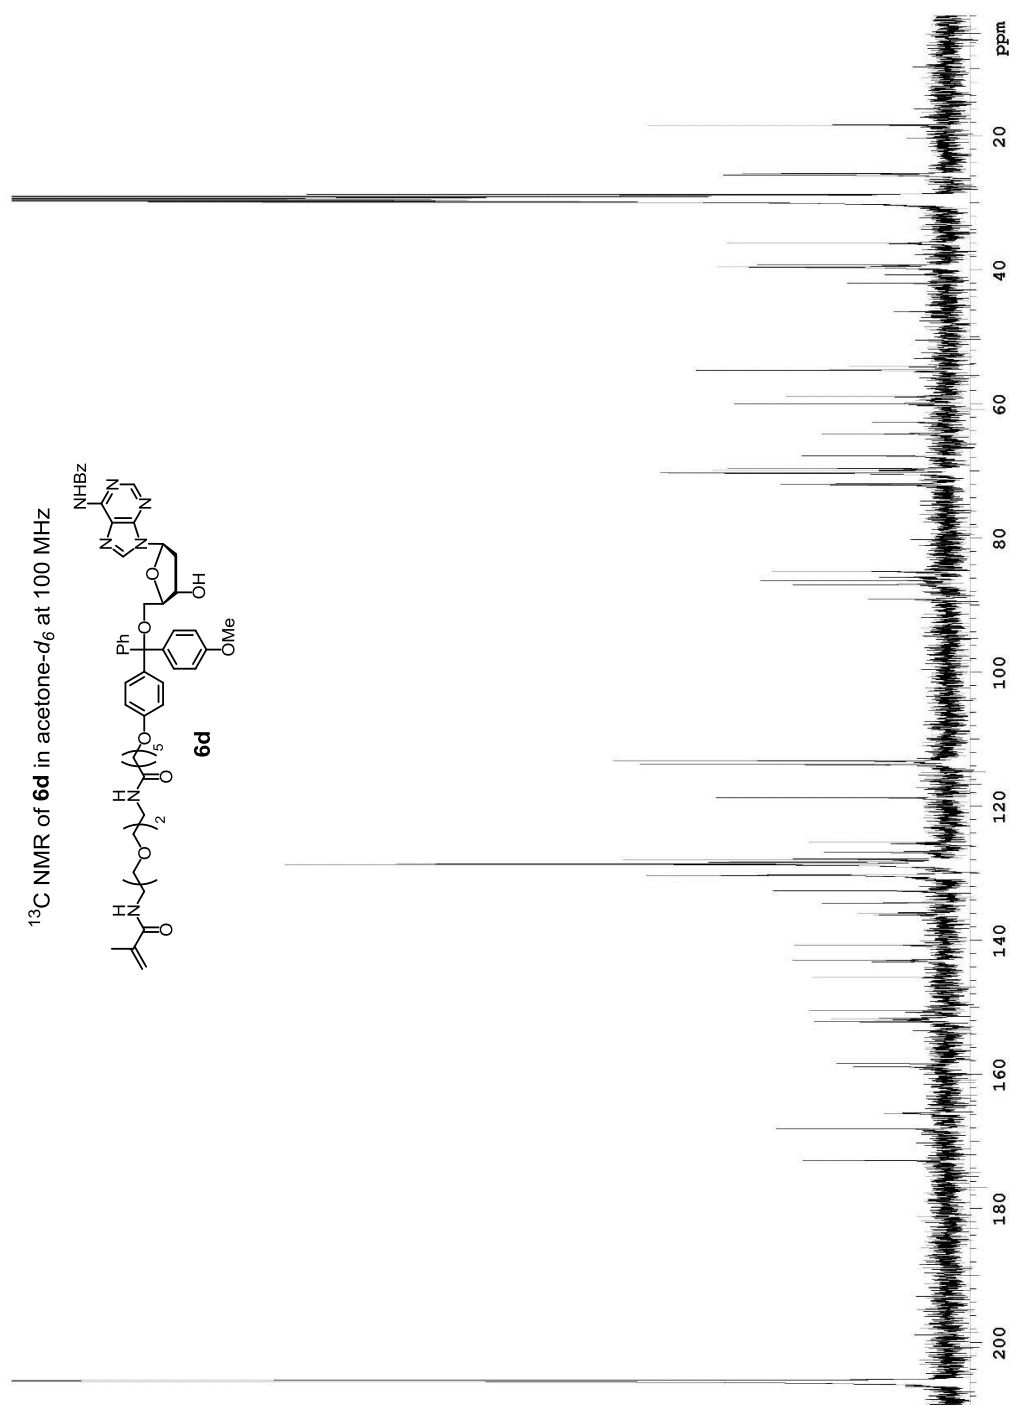

<sup>1</sup>H NMR of compound **1a** in acetone-d<sub>6</sub> at 400 MHz

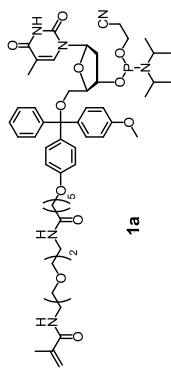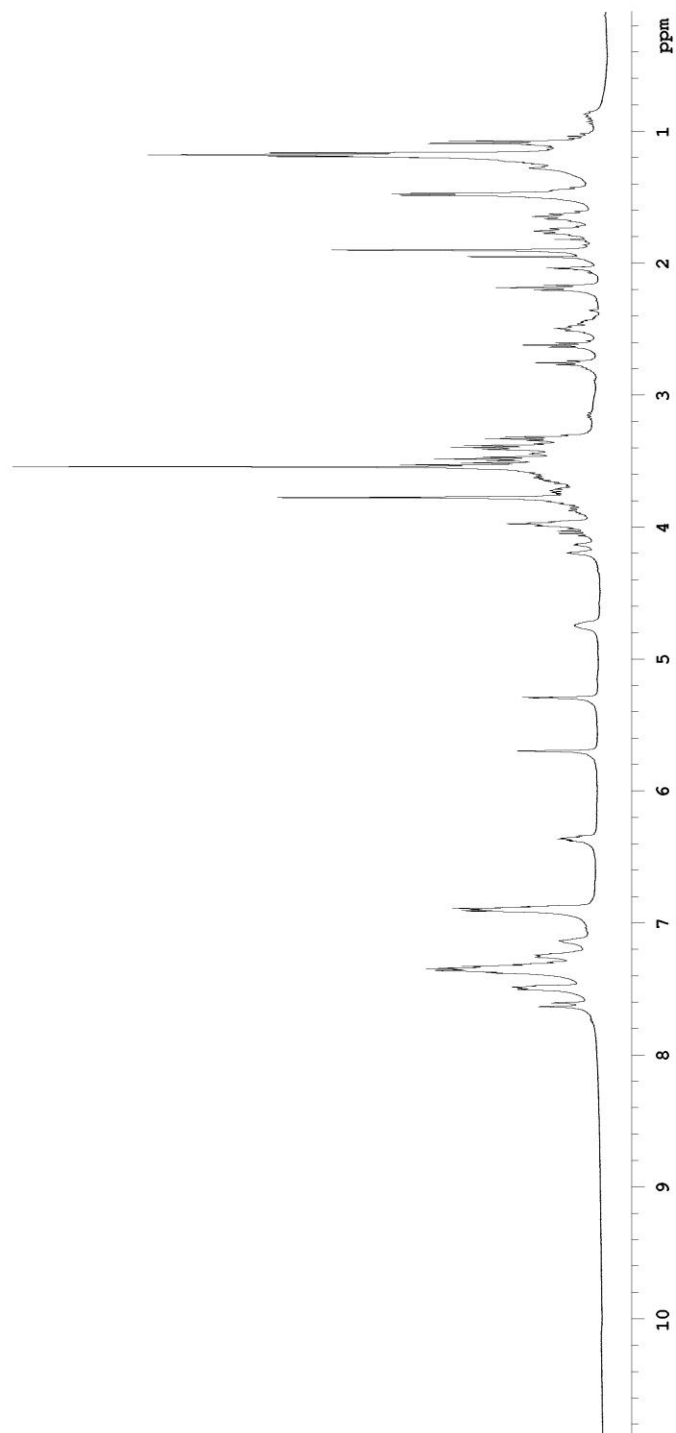

$^{13}\text{C}$  NMR of compound **1a** in acetone- $d_6$  at 100 MHz

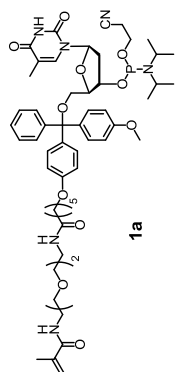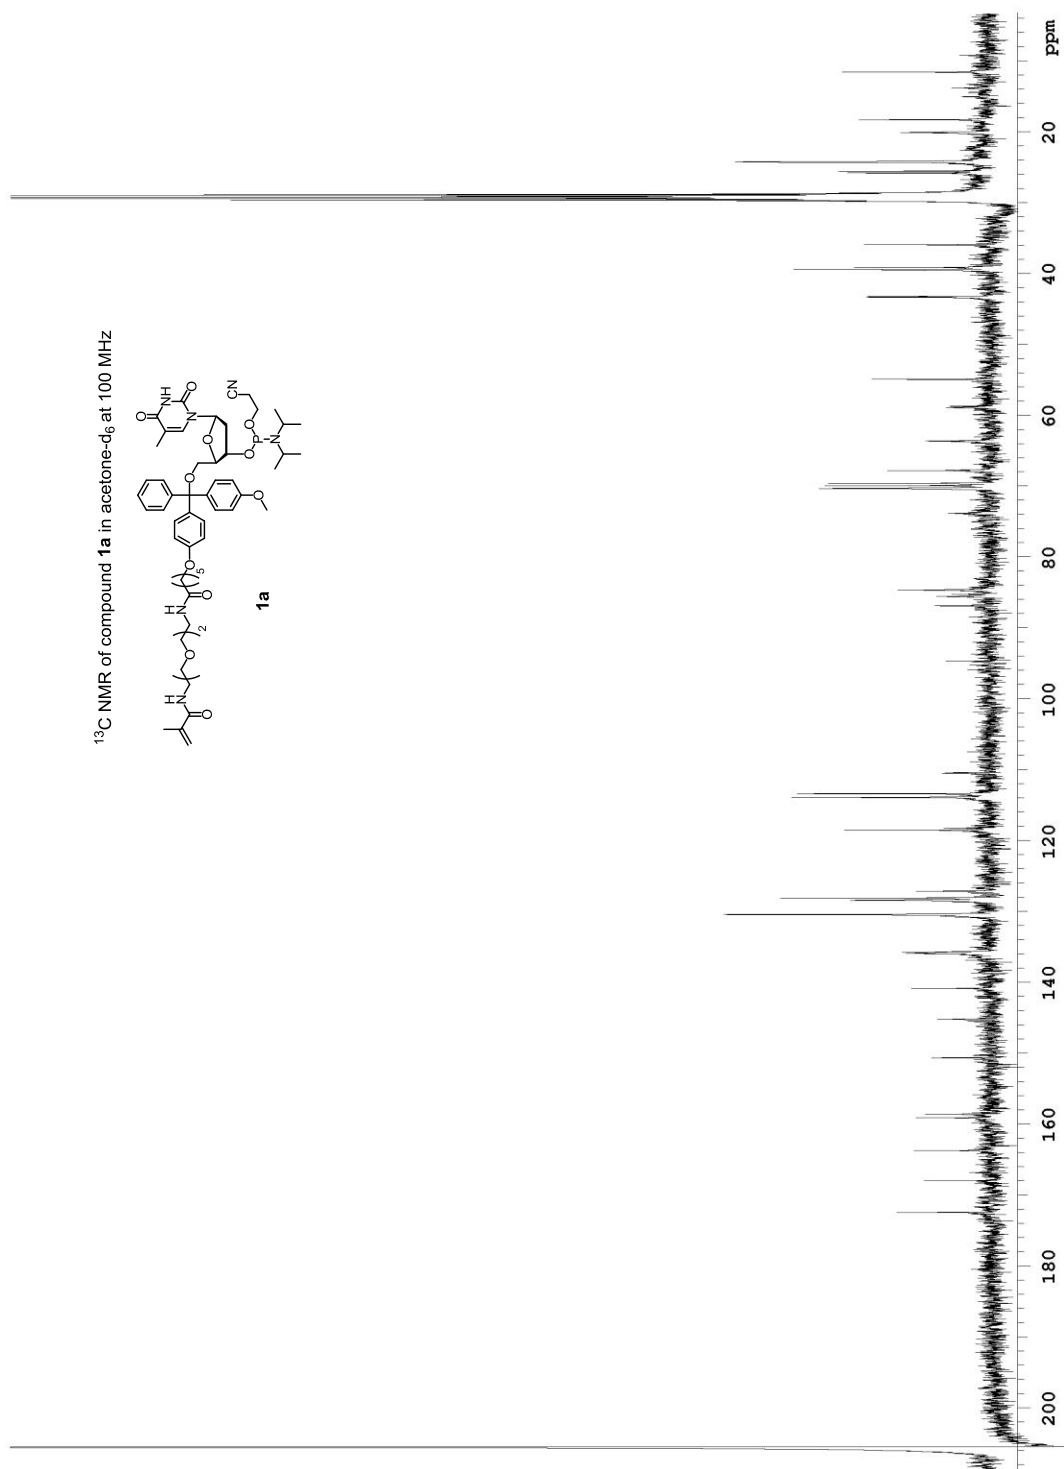

$^{31}\text{P}$  NMR of compound **1a** in acetone- $d_6$  at 162 MHz

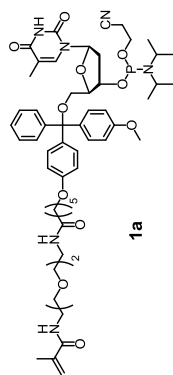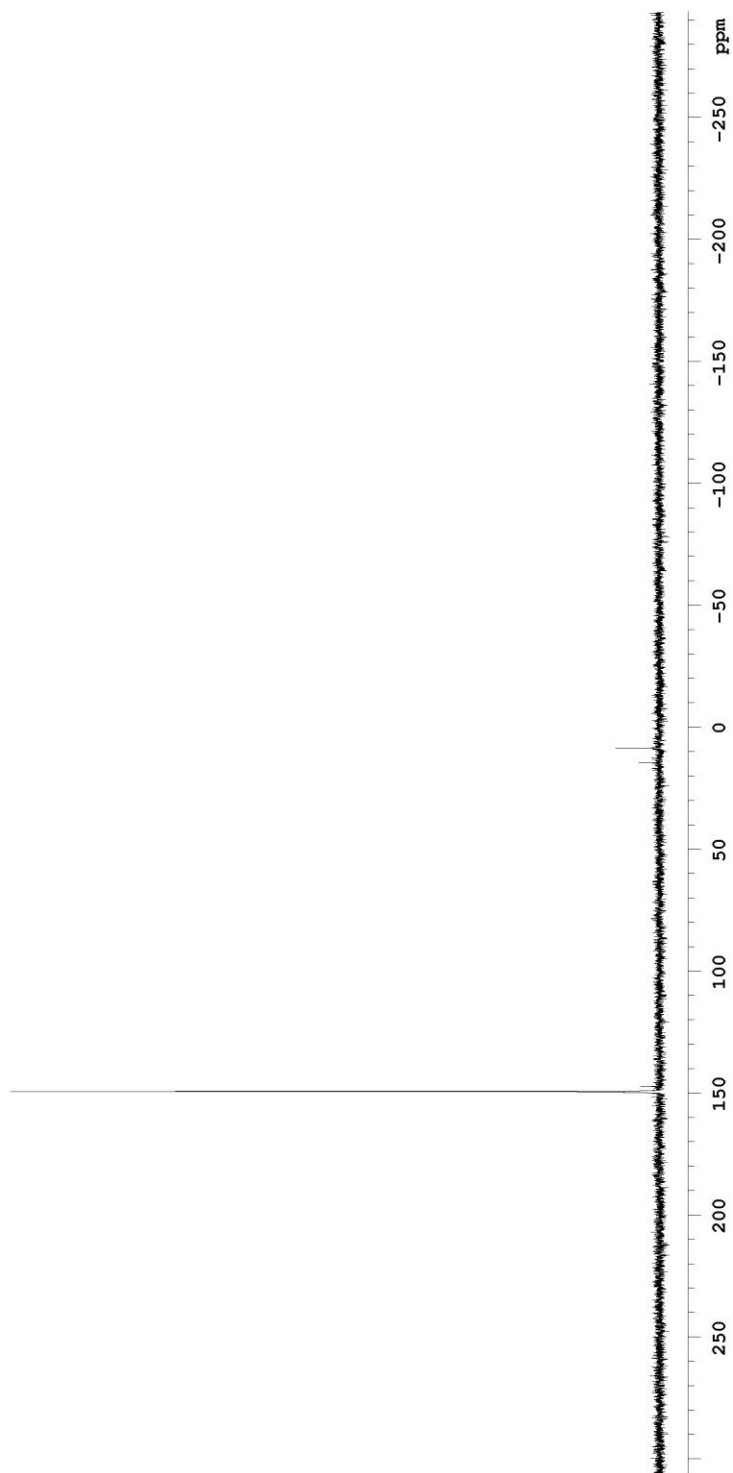



$^{13}\text{C}$  NMR of **1b** in acetone- $d_6$  at 100 MHz

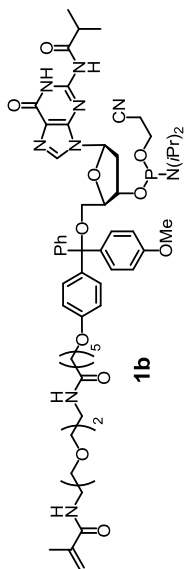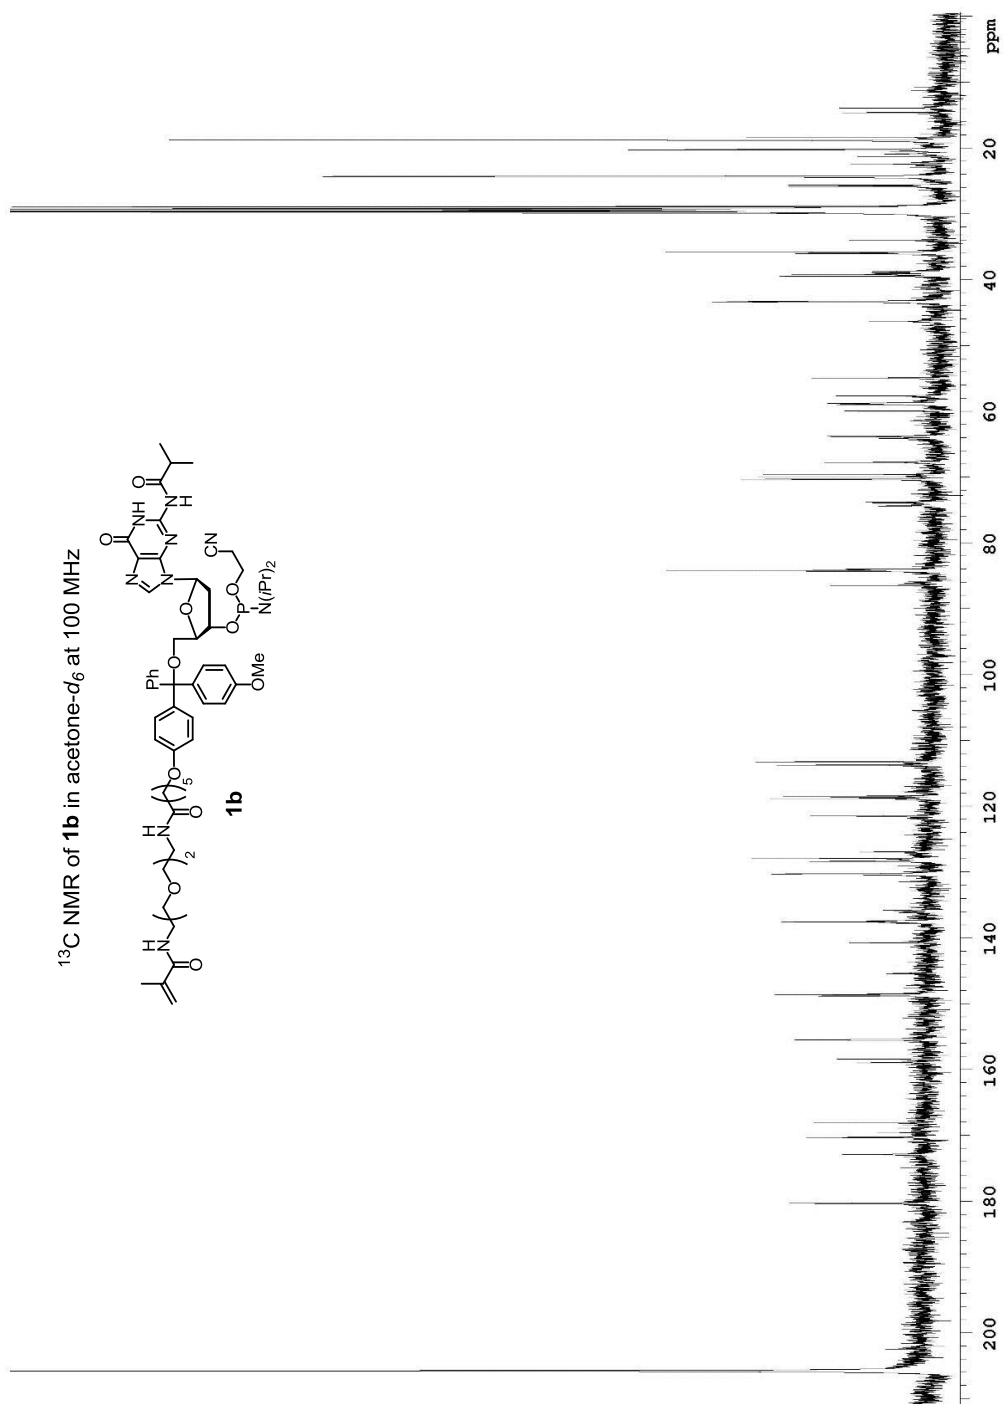

$^{31}\text{P}$  NMR of **1b** in acetone- $d_6$  at 162 MHz

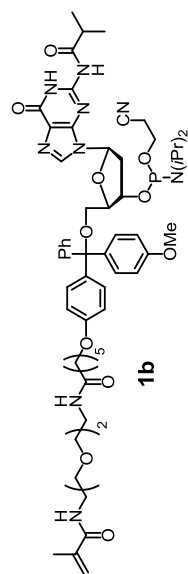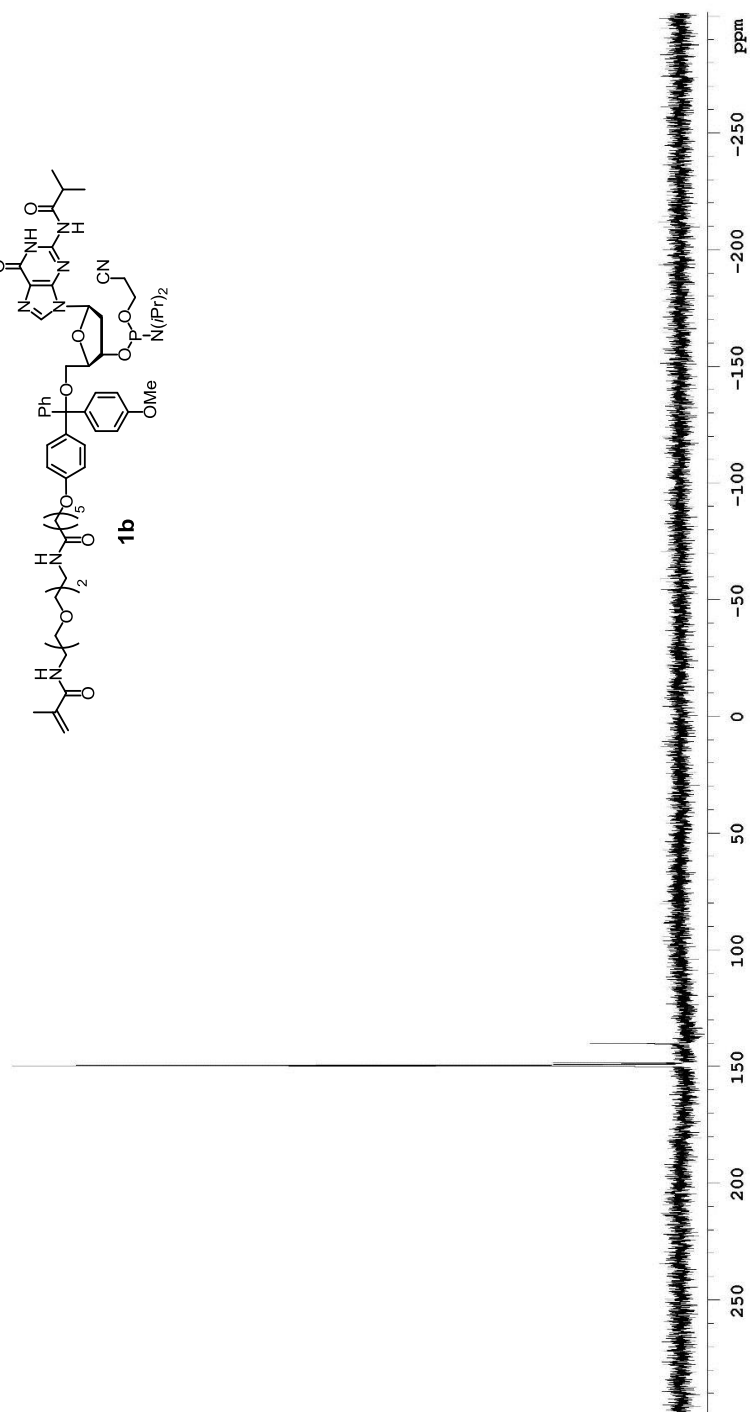



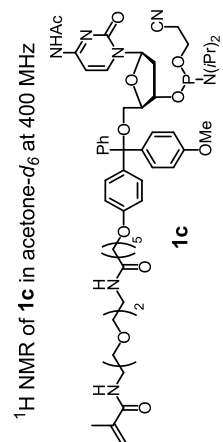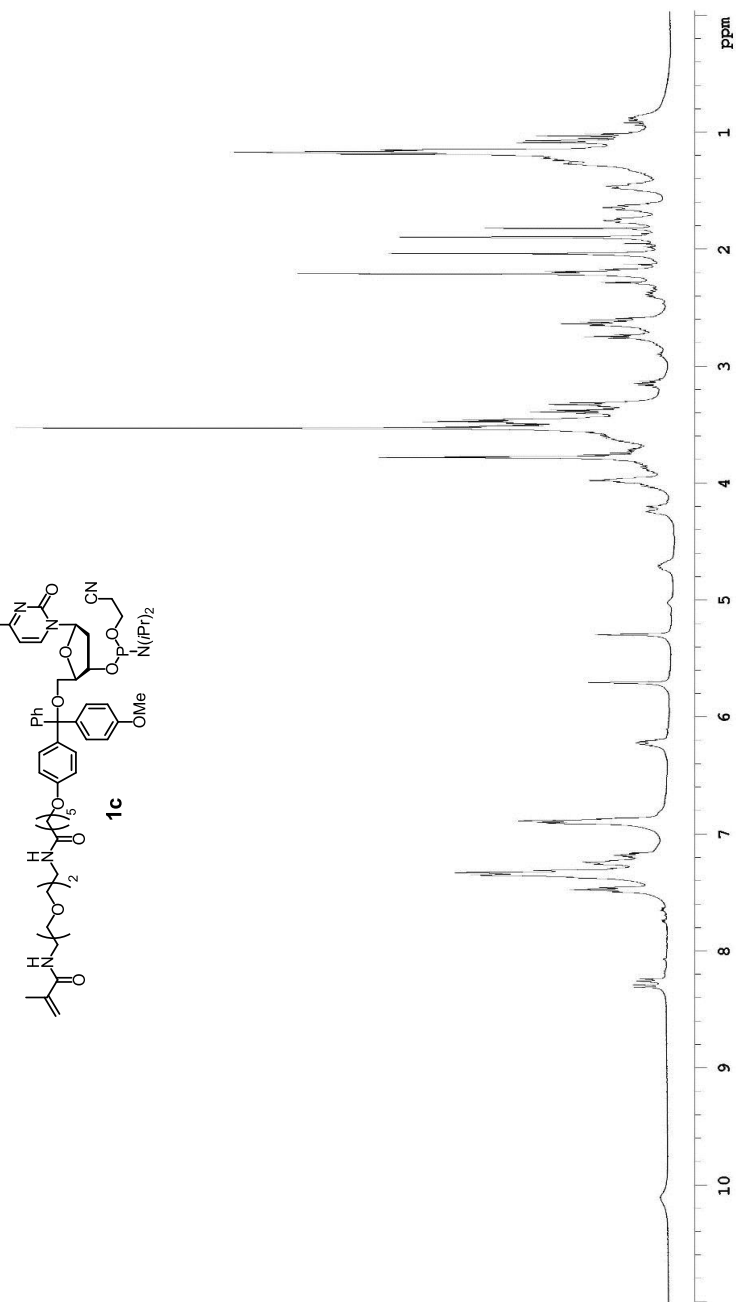

$^{13}\text{C}$  NMR of **1c** in acetone- $d_6$  at 100 MHz

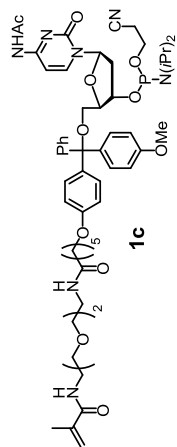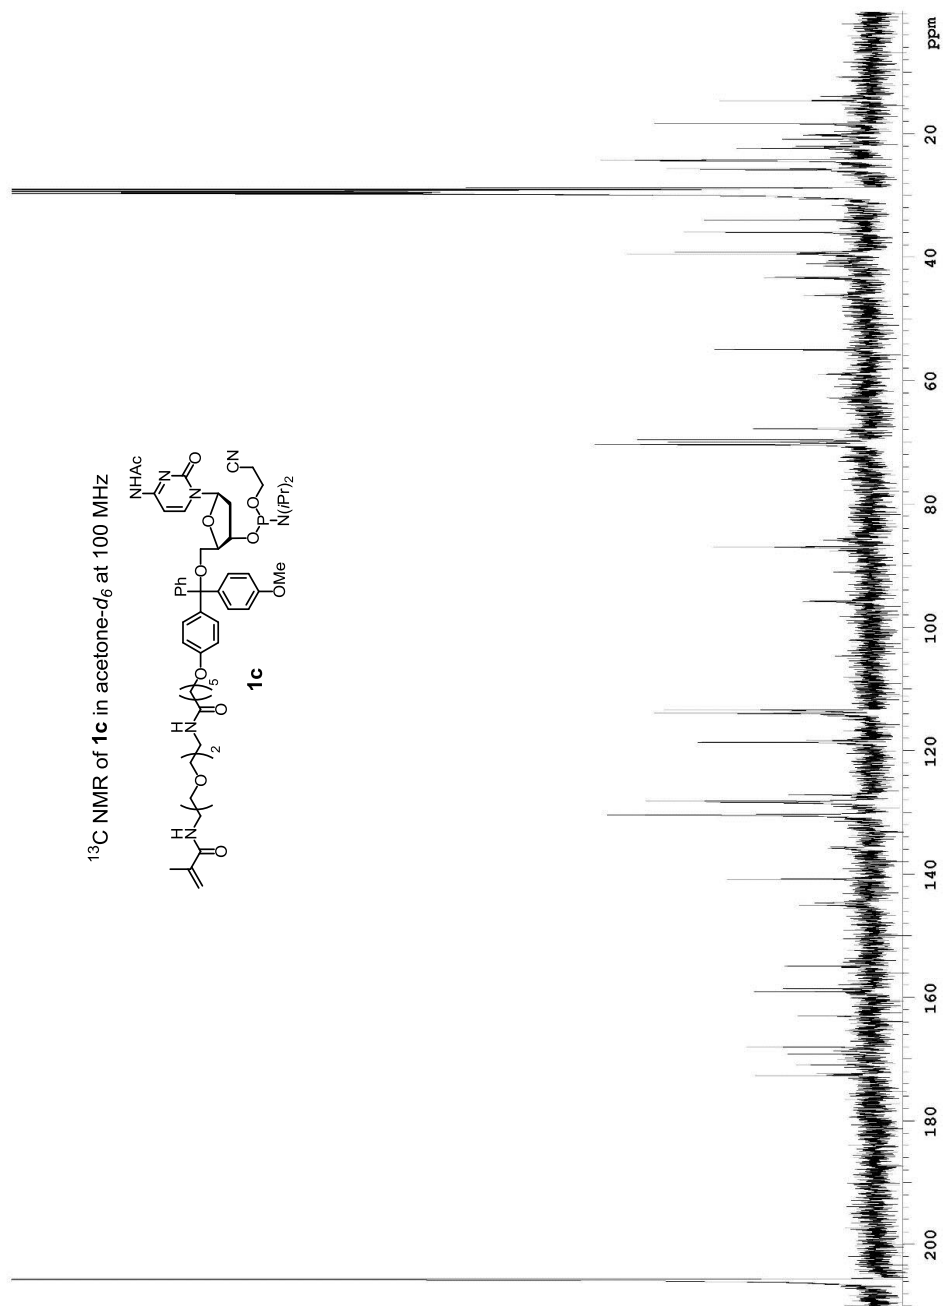

$^{31}\text{P}$  NMR of **1c** in acetone- $d_6$  at 162 MHz

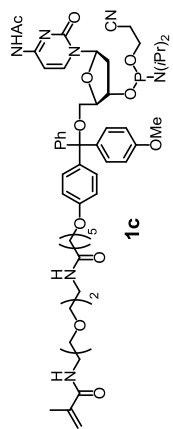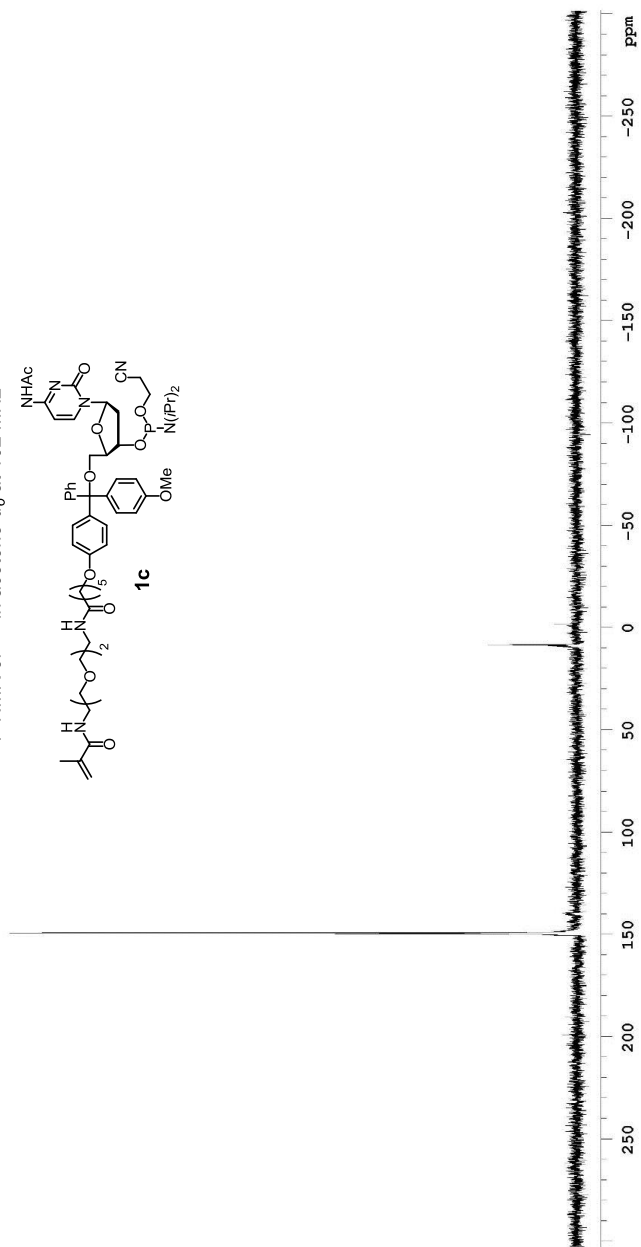

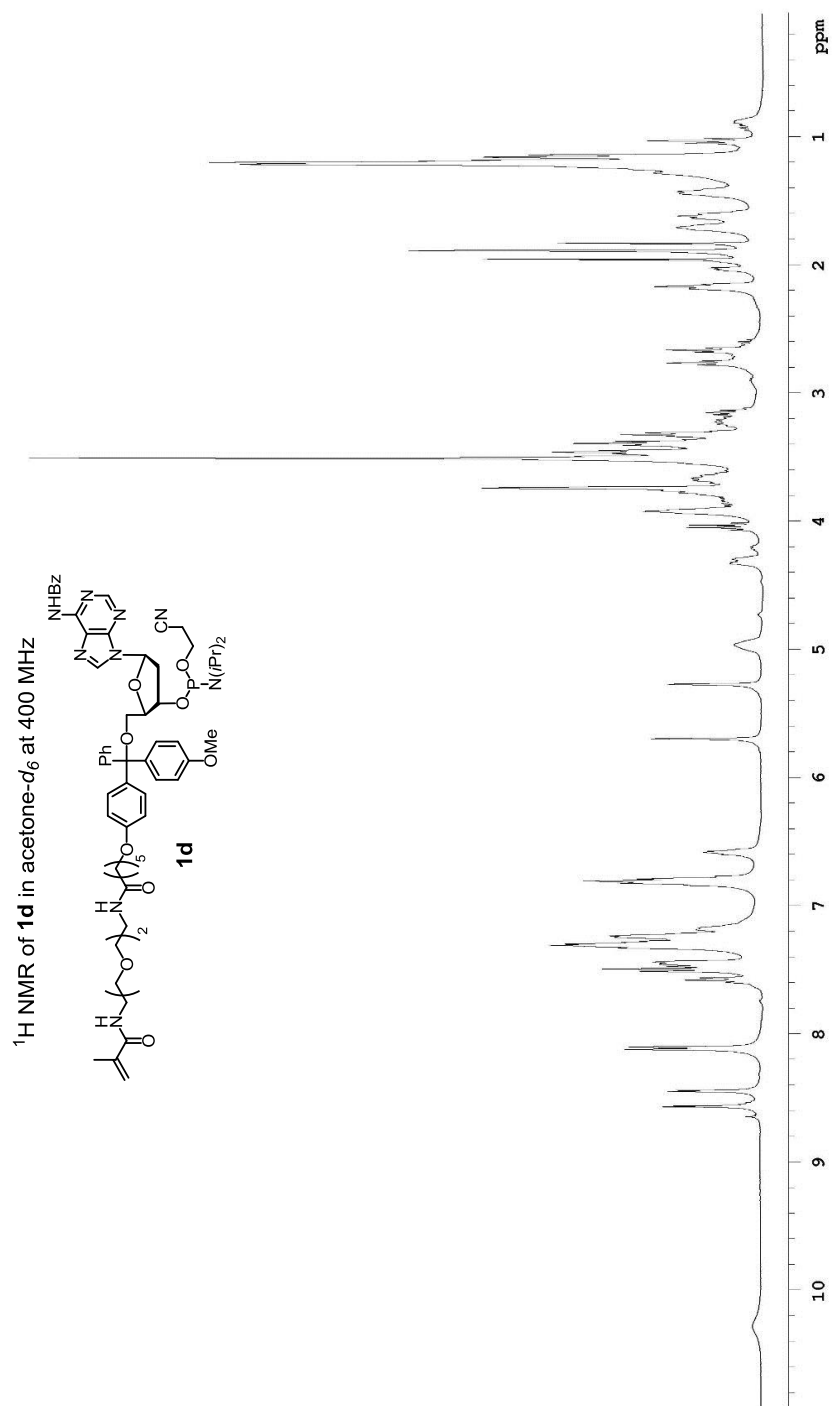

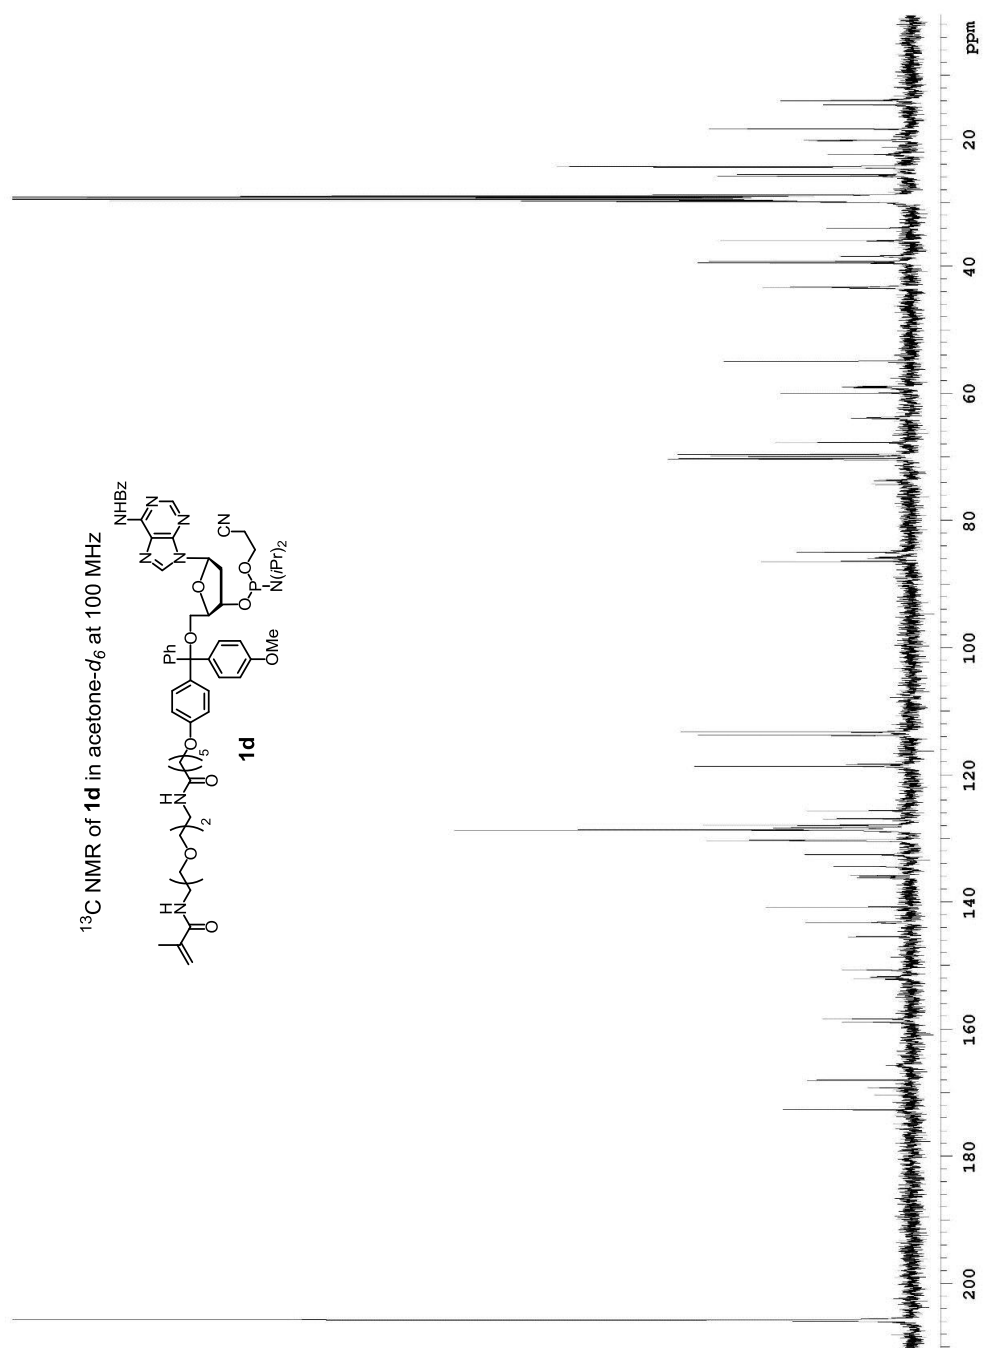

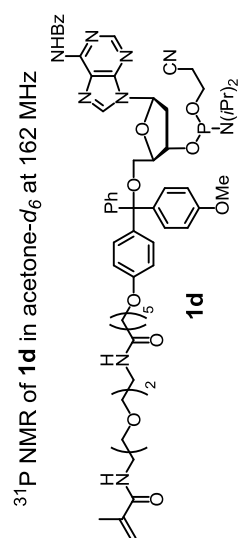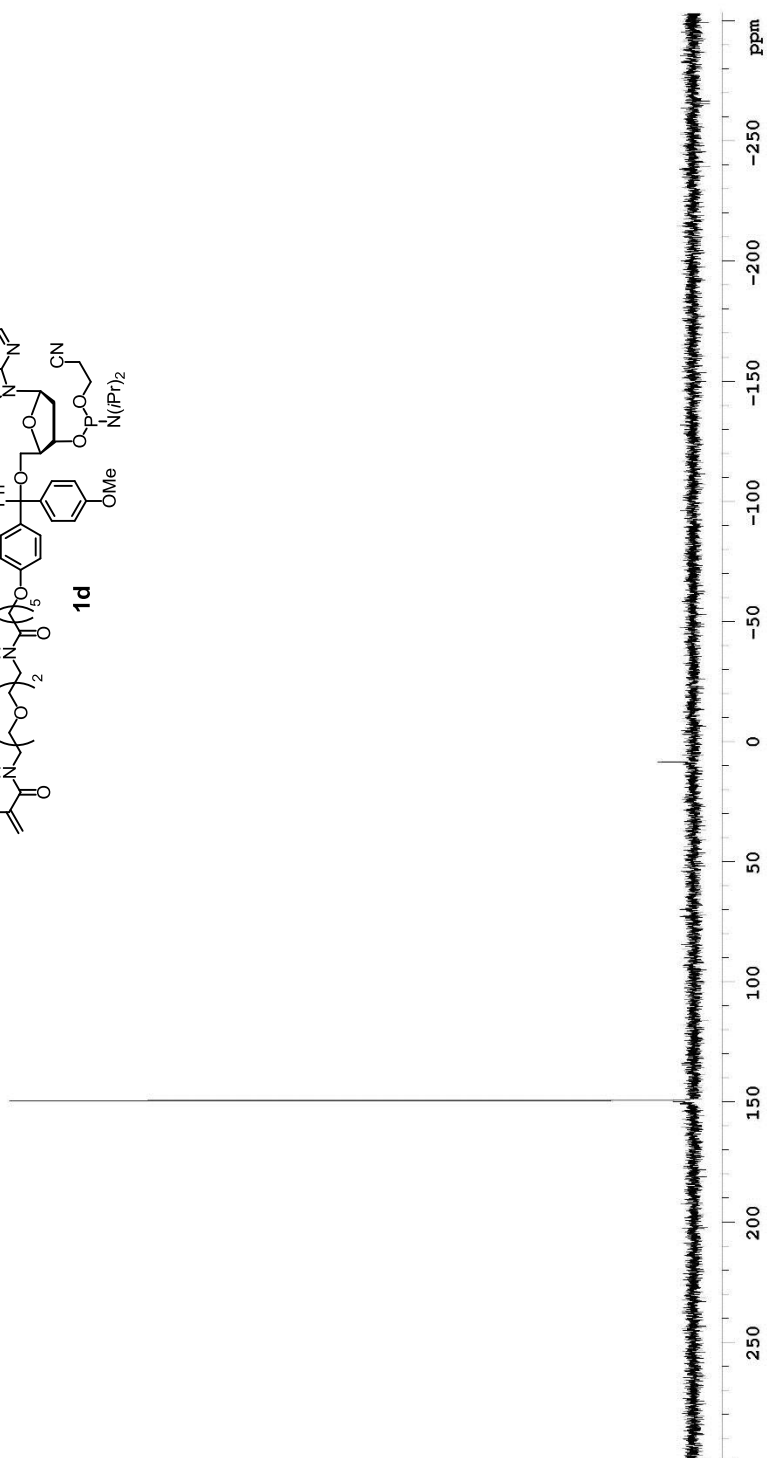

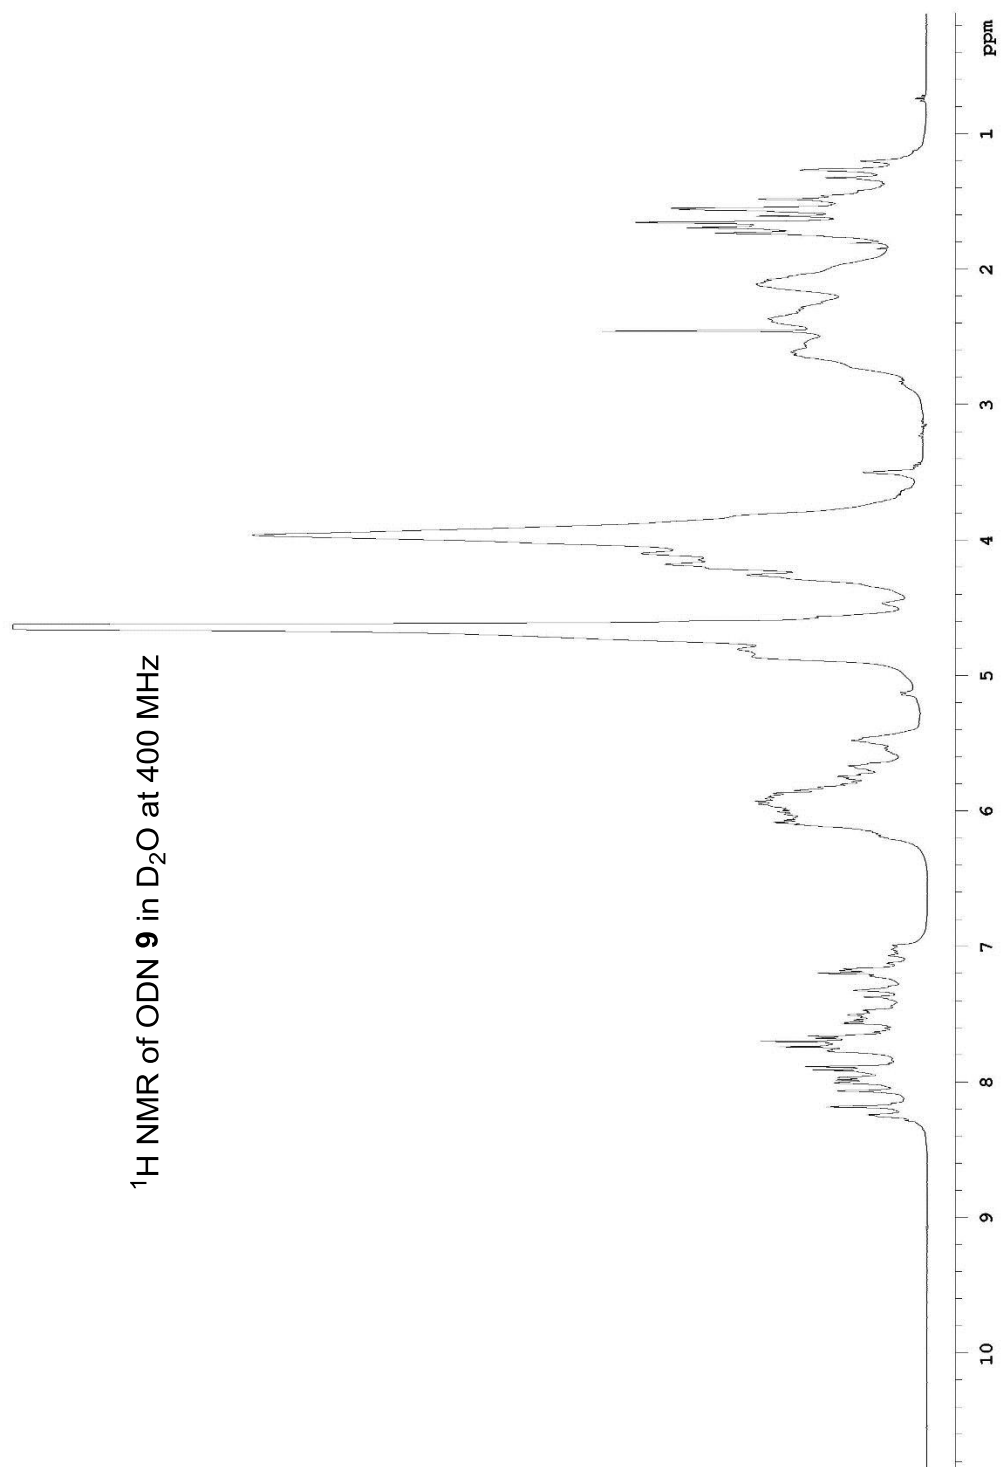

$^{31}\text{P}$  NMR of ODN **9** in  $\text{D}_2\text{O}$  at 162 MHz

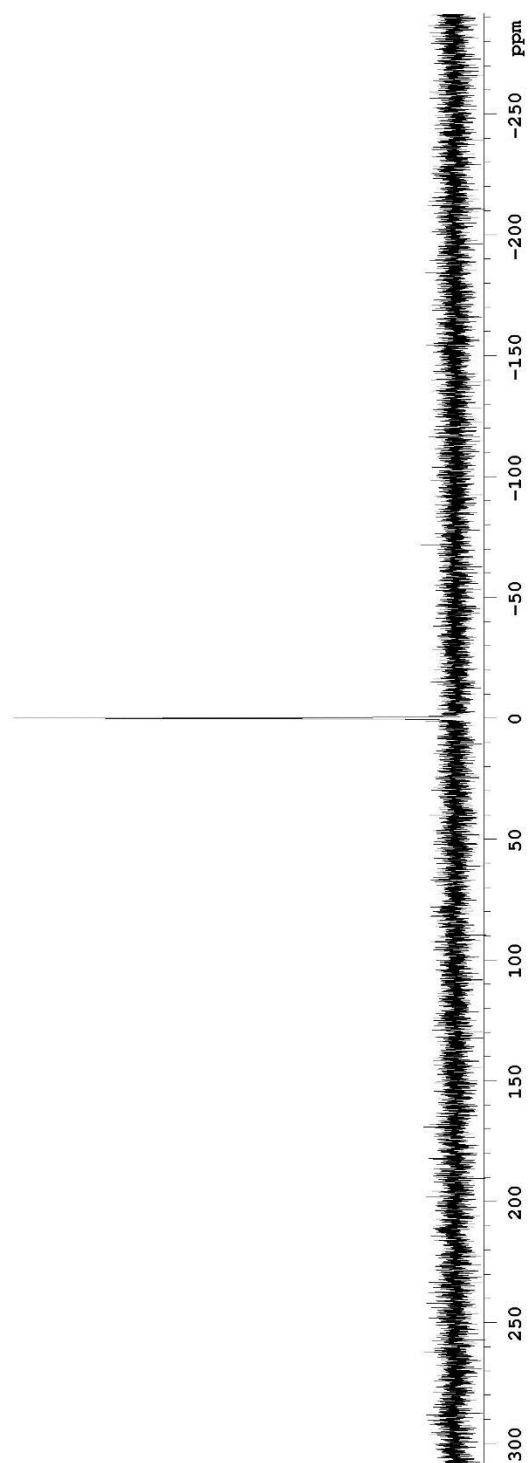







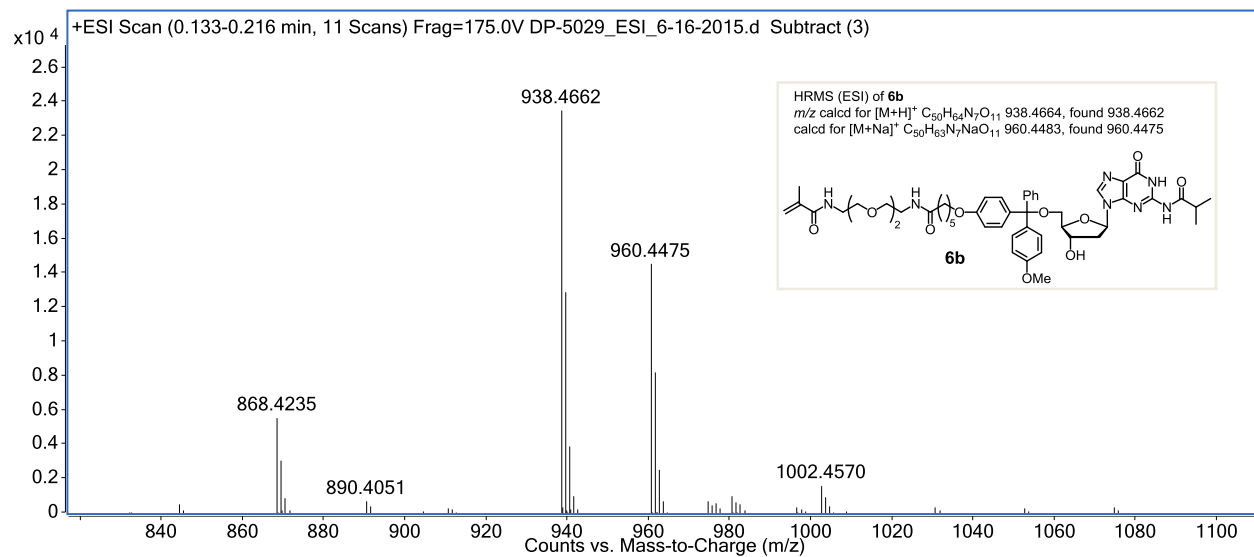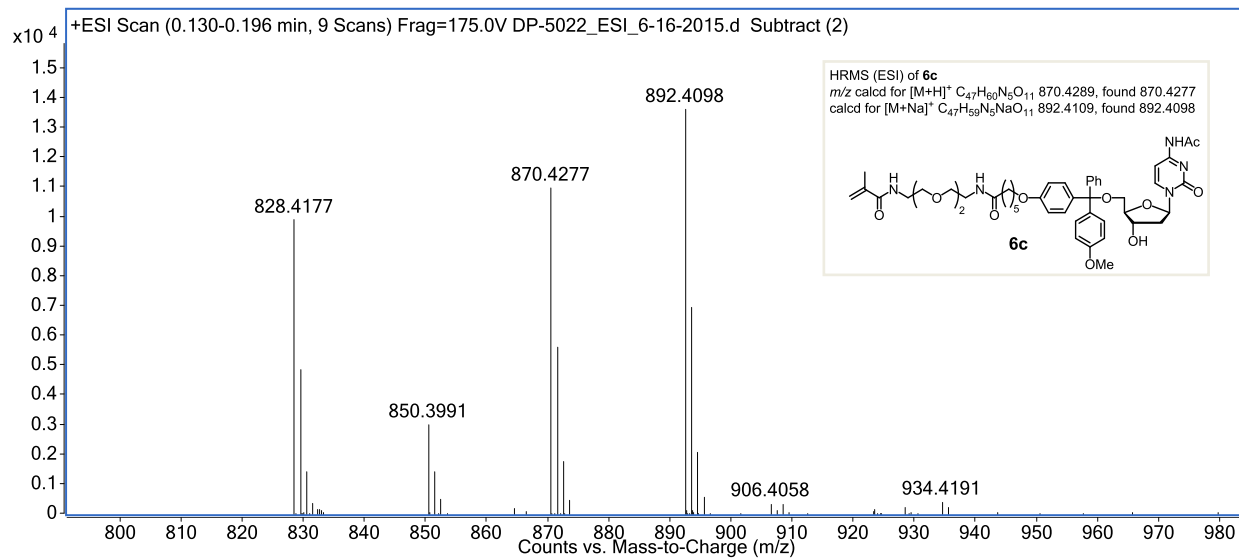

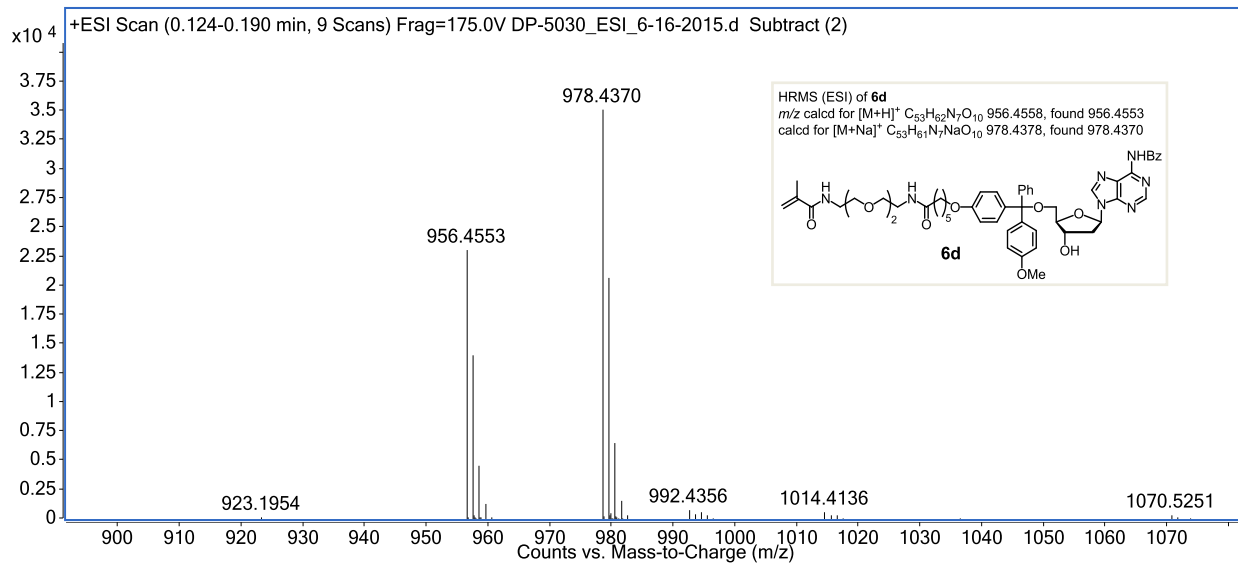

09-13-2014-Durga-Rxn-5003 #395 RT: 9.74 AV: 1 NL: 6.41E7  
 T: + c ESI Full ms [ 150.00-2000.00]

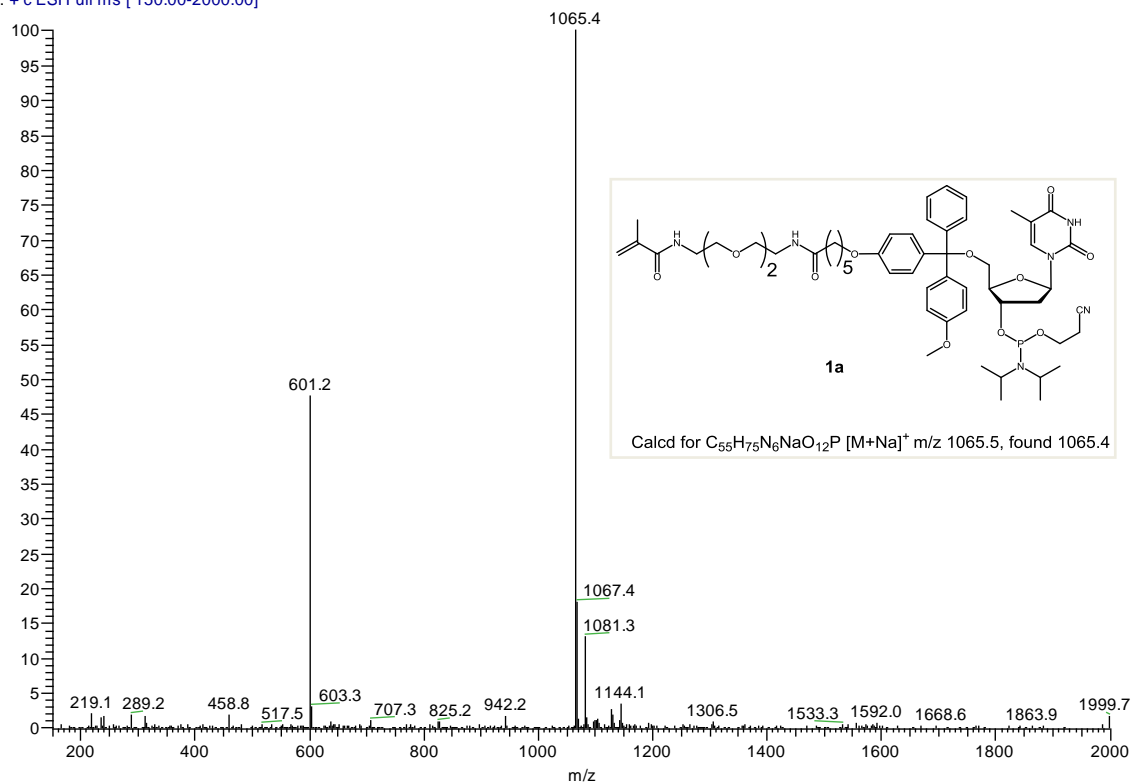

06-02-2015-Durga-dg-phos-5035-rm #177 RT: 4.51 AV: 1 NI: 4 51F6  
T: + c ESI Full ms [150.00-2000.00]

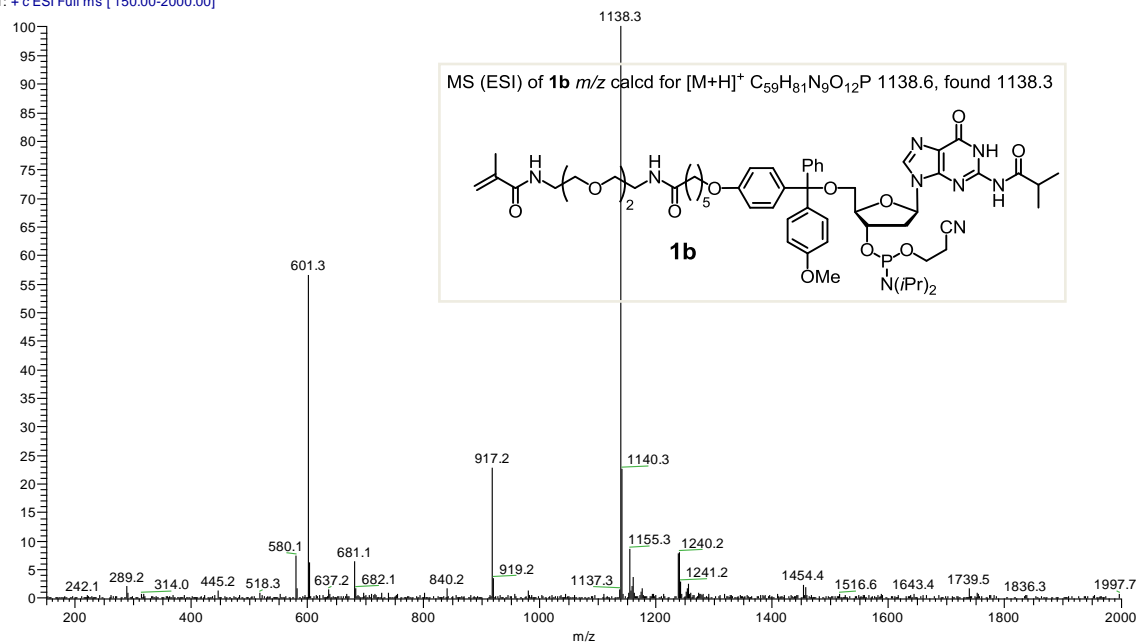

07-15-2015-Durga-5024-dc-new-phos\_150714151347 #132 RT: 3.40 AV: 1 NI: 1 85F6  
T: + c ESI Full ms [150.00-2000.00]

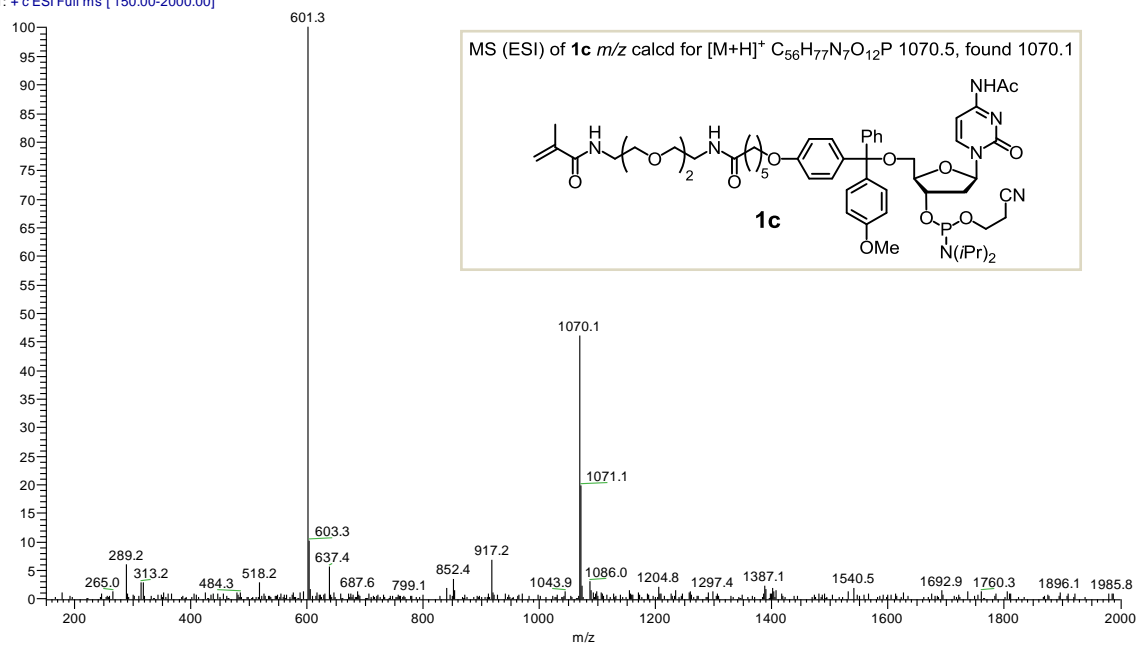

05-18-2015-Durga-5031-dA phosphoramidite #132 RT: 3.36 AV: 1 NI: 3 5AF6  
T: + c ESI Full ms [150.00-2000.00]

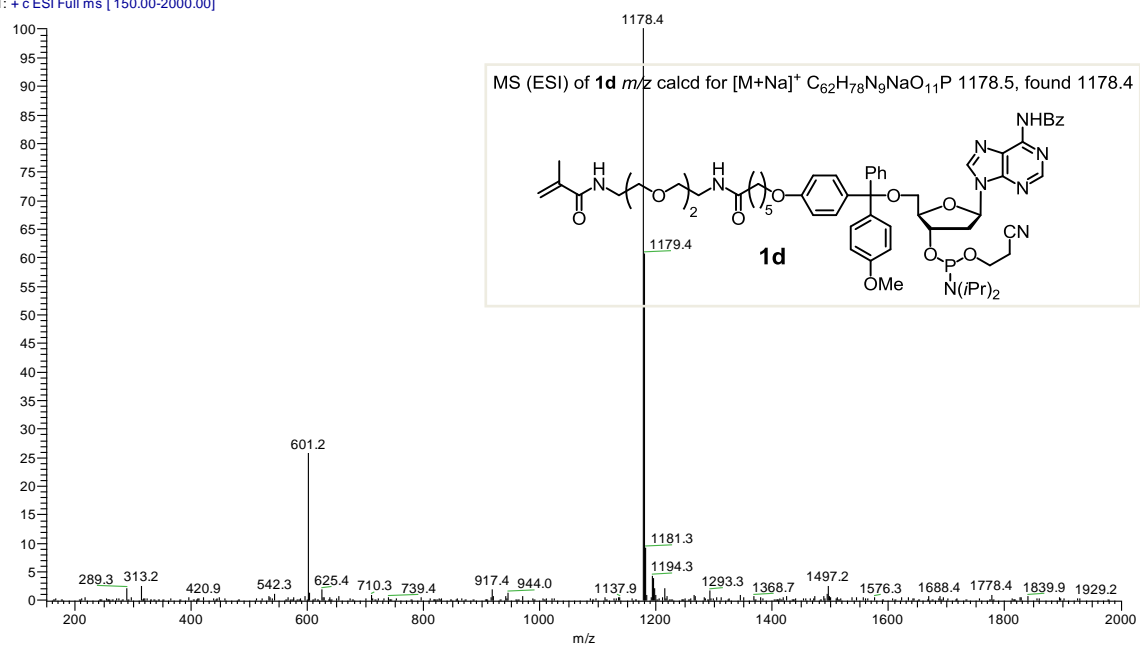

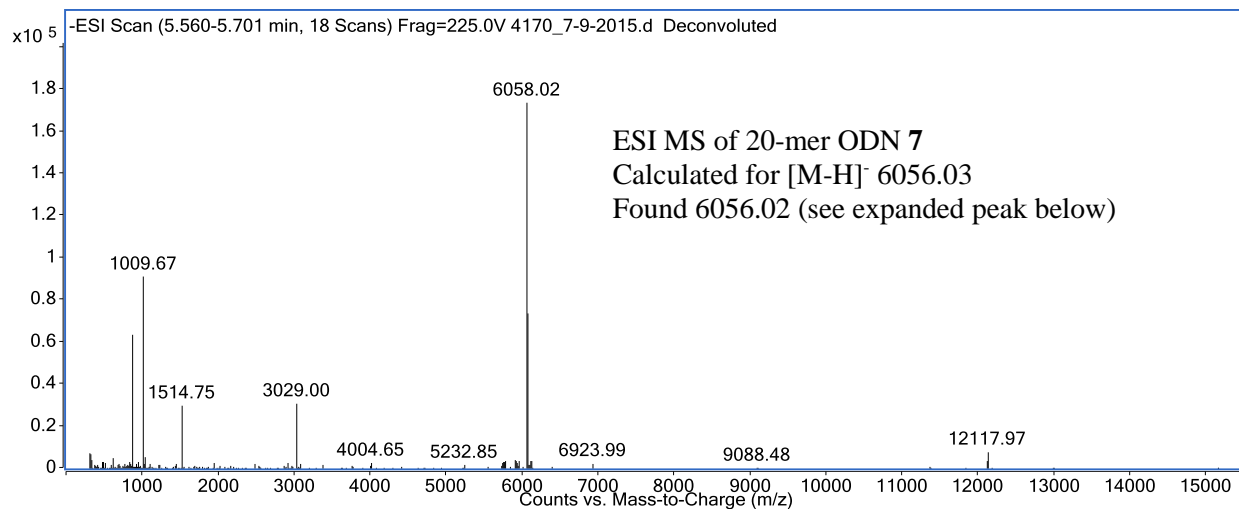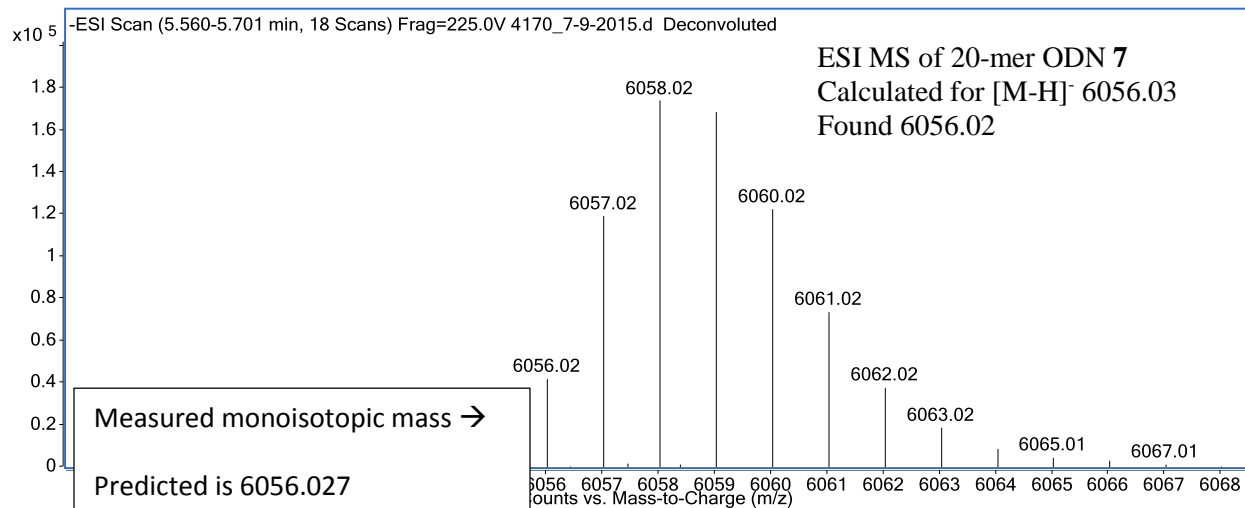

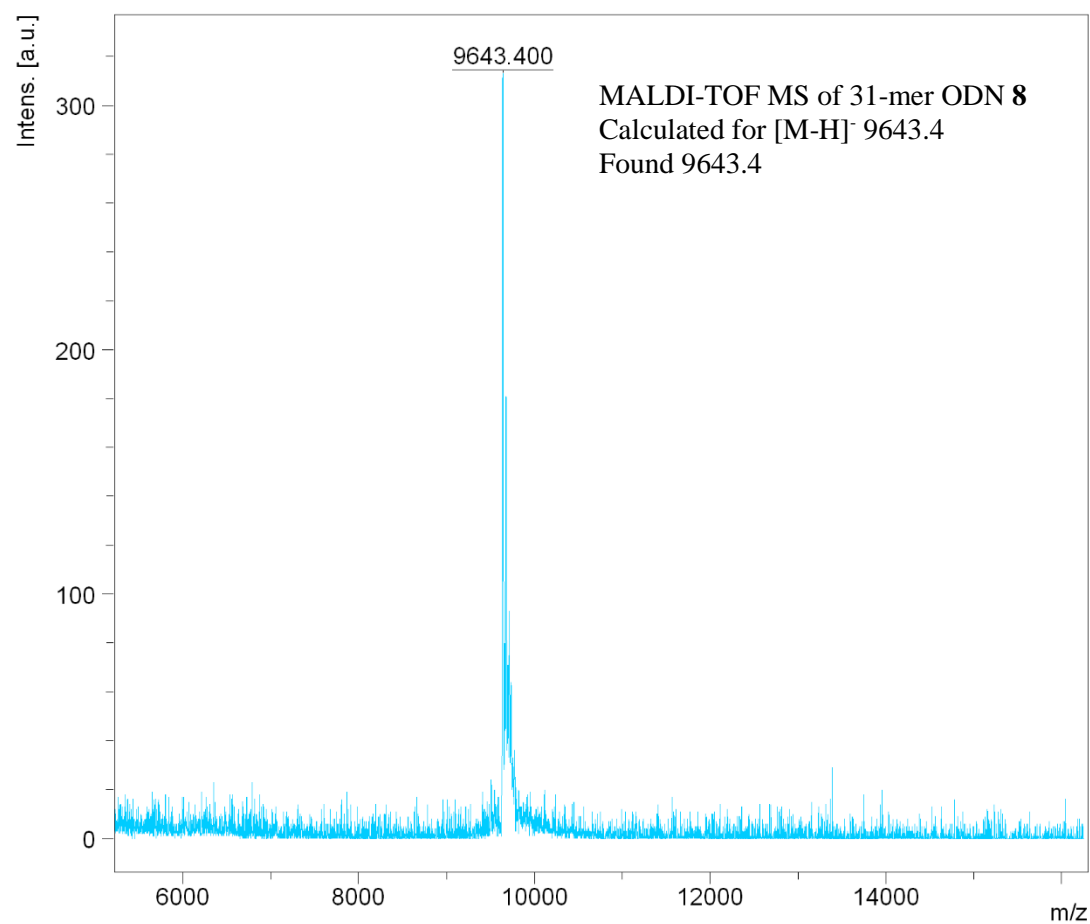



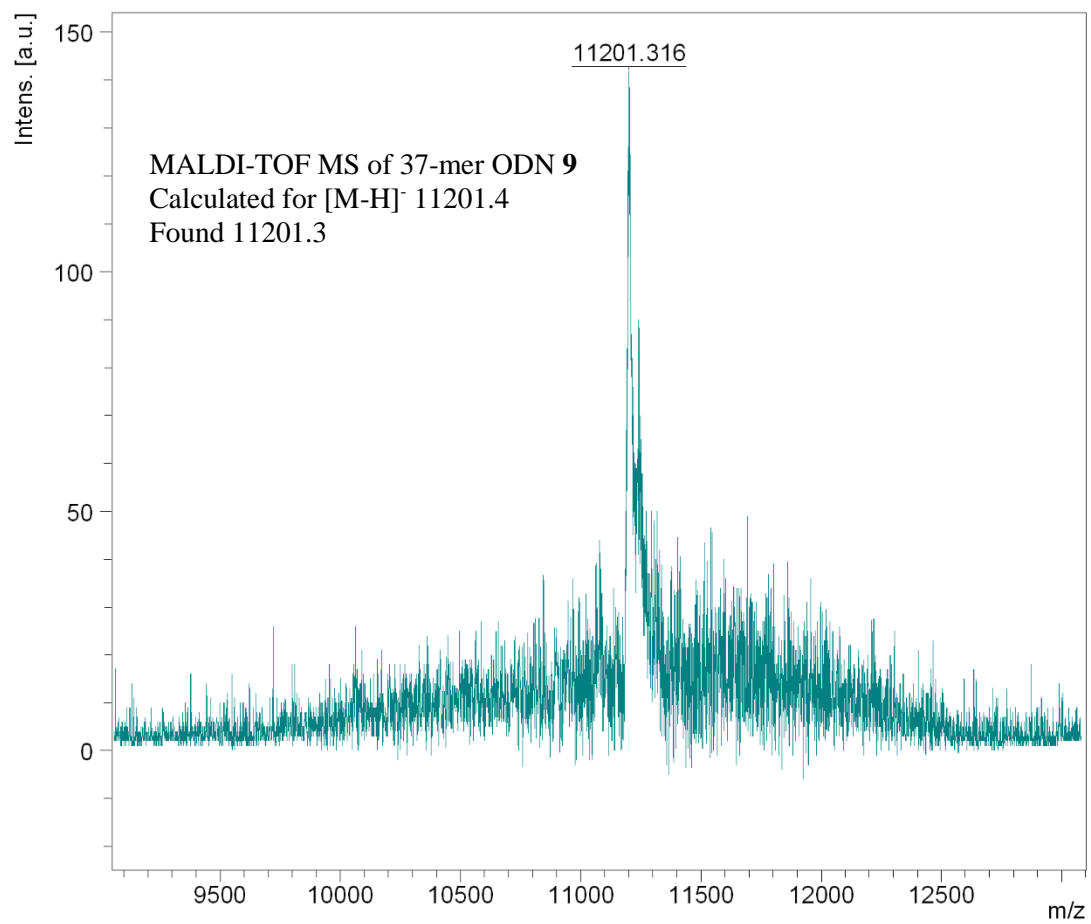

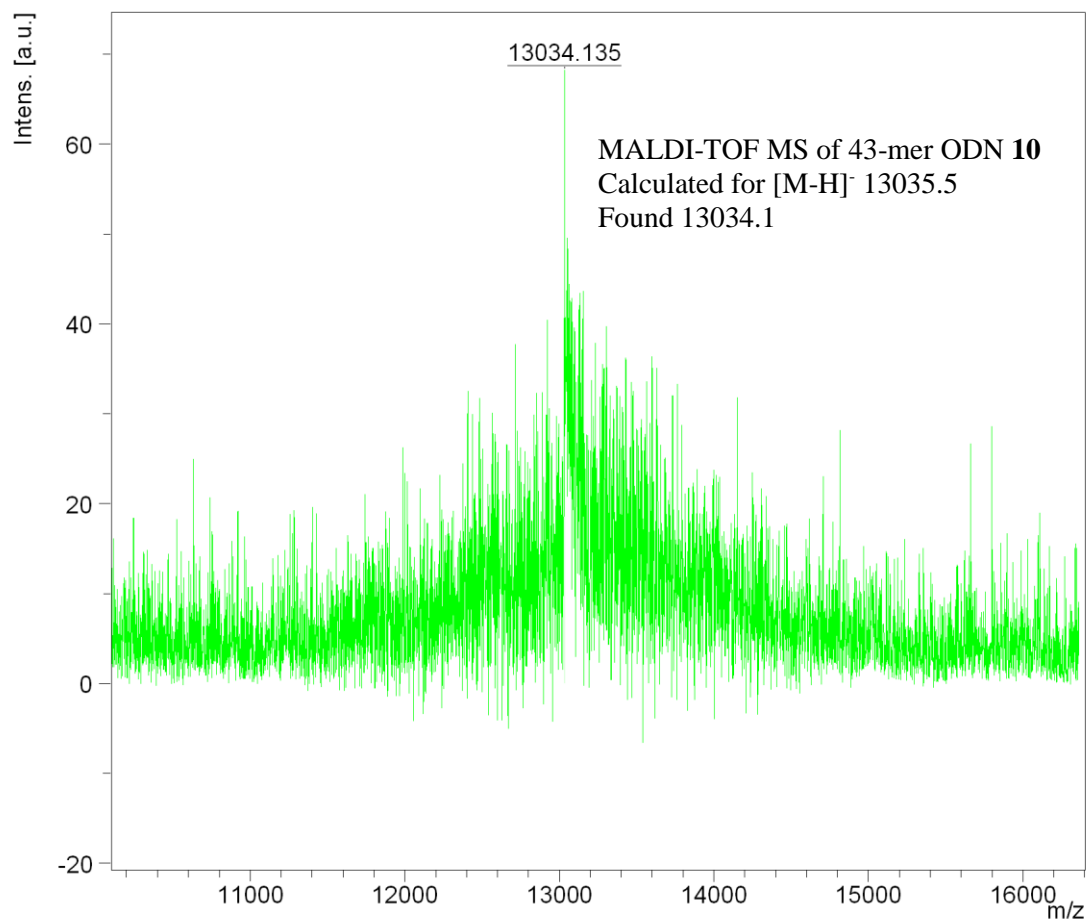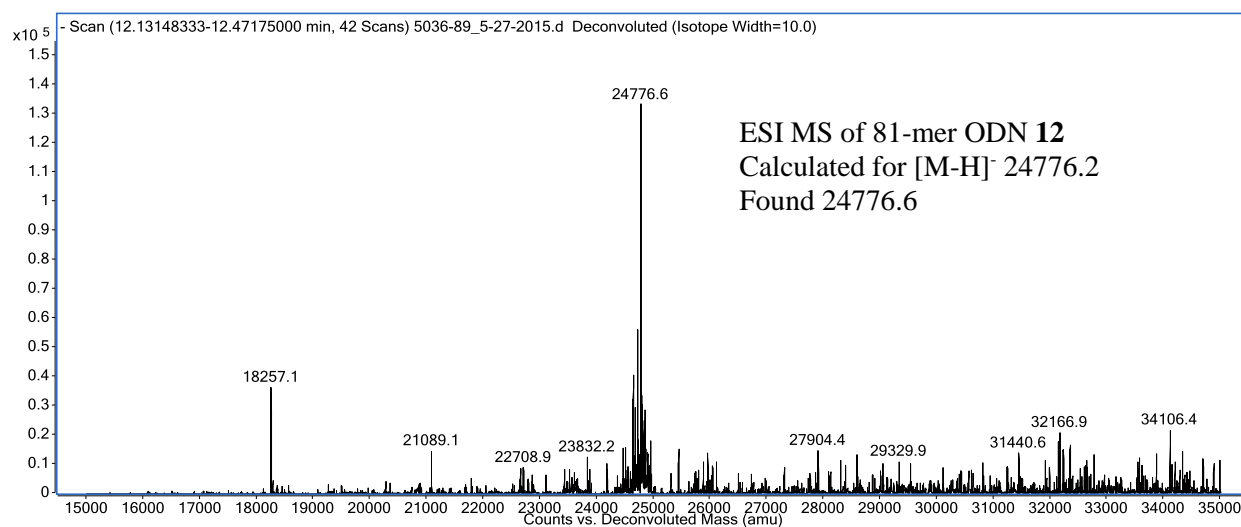

Protocol:

## Purification of Synthetic Oligodeoxynucleotide by Polymerizing Full-Length Sequences

### PRINCIPLE

During oligodeoxynucleotide (ODN) synthesis, the failure sequences are capped with Ac<sub>2</sub>O and full-length sequences are tagged with the polymerizable methacryl phosphoramidite **1a-c** or **1d** depending on the last nucleotide on the 5'-end. After cleavage and deprotection, the crude contains the full-length sequences (the product) with a polymerizable group, failure sequences and small molecules. In purification, the full-length sequences are copolymerized into a polyacrylamide gel. Failure sequences and small molecules are washed away. The product is cleaved and extracted, and precipitated with *n*BuOH.

### MATERIALS

Polymerizable tagging methacrylamidite **1a-c** or **1d** (**1a**, MW 1043.2, 52.2 mg, 50  $\mu$ mol; **1b**, MW 1138.3, 56.9 mg, 50  $\mu$ mol; **1c**, MW 1070.2, 53.5 mg, 50  $\mu$ mol; **1d**, MW 1156.3, 57.8 mg, 50  $\mu$ mol; the amount may be enough for two 1  $\mu$ mol synthesis/purification)  
Polymerization mix (**PM**, *N,N*-dimethylacrylamide, MW 99.1, d 0.96, 218 mg, 227  $\mu$ l, 2.21 mmol; *N,N'*-methylenebis(acrylamide), MW 154.2, 17 mg, 110  $\mu$ mol; cross-linking ratio 20:1)  
Polymerization initiator A (**PIA**, ammonium persulfate, MW 228.2, 10 mg, 44  $\mu$ mol)  
Polymerization initiator B (**PIB**, *N,N,N',N'*-tetramethylethylenediamine, MW 116.2, d 0.78, 15.5 mg, 20  $\mu$ l, 132  $\mu$ mol)  
Centrifugal filter unit

### PROTOCOL

#### ODN synthesis using **1a-c** or **1d** to tag full-length sequences

1. Set up ODN synthesis on a synthesizer (ABI-394 is used as example) as usual using Ac<sub>2</sub>O or Pac<sub>2</sub>O for capping with the exceptions describe below. Do not use amidite solutions that are stored for more than two weeks.
2. Add 500  $\mu$ l dry acetonitrile to **1a-c** or **1d** (0.1 M). Shake gently to dissolve.
3. Attach the **1a-c** or **1d** solution to the 5<sup>th</sup> amidite position. Minimize exposure of the solution to air.
4. Create a new cycle by modifying the standard 1  $\mu$ mol cycle. Copy the standard cycle to a new file (for < 1  $\mu$ mol synthesis, copy the corresponding standard cycle). After the coupling steps and before the capping steps, insert a 180 sec (or slightly longer) waiting step and set the step active only for base 5.
5. When editing sequence, add base 5 at the 5'-end (the sequence will have dT, dG, dC or dA at the 5'-end).
6. Start synthesis using the new cycle. Select 5'-DMTr on. Perform cleavage and deprotection as usual (conc. NH<sub>4</sub>OH, 55 °C, 10-15 h; or conc. NH<sub>4</sub>OH/MeNH<sub>2</sub> 1/1, rt,  $\geq$ 3 h).

7. Transfer the ODN solution into a 1.5 ml centrifuge tube with a pipette. Add ~100  $\mu$ l (~570  $\mu$ mol) DIEA, and evaporate volatiles. The residue is the crude ODN with full-length sequences being tagged with **1a-c** or **1d**.
8. The tag **1a-c** or **1d** can also be incorporated with standard synthesis cycle. In this case, only need to put base 5 at the 5'-end during sequence editing. There is no need to edit cycle. If convenient, hold the coupling step for base 5 for 180 sec, which may increase yield. Remember not to remove 5'-DMTr.

#### *Polymerize full-length sequences*

9. Add 340  $\mu$ l ddH<sub>2</sub>O (for >80-mer, use 7 M urea instead) to **PM**. Vortex and spin briefly.
10. Add 190  $\mu$ l ddH<sub>2</sub>O to **PIA**. Vortex and spin briefly.
11. Add 190  $\mu$ l ddH<sub>2</sub>O to **PIB**. Vortex and spin briefly.
12. Add 50  $\mu$ l (no need to change volume with scales of  $\leq 1$   $\mu$ mol and oligo length) ddH<sub>2</sub>O (for >80-mer, use 7 M urea instead) to crude ODN. Vortex and spin briefly. If desired, inject ~1  $\mu$ l into RP HPLC for analysis.
13. Add 12  $\mu$ l (for  $x$   $\mu$ mol  $n$ -mer oligo, use  $x \times n \times 0.6$   $\mu$ l but not less than 12  $\mu$ l) **PM** solution. Vortex and spin briefly.
14. Add **PIA** and **PIB** (5  $\mu$ l each irrespective of scale and ODN length), vortex (~1 sec) and spin (~5 sec) immediately; and immediately transfer the mixture into the centrifugal filter unit over filter before polymerization occurs. Try to transfer all contents by sucking with a pipette slowly. Deposit contents to the center by pushing the pipette slowly to avoid splashing. If polymerization occurs before transfer, transferring the gel to the filter tube is acceptable too.
15. Cap the filter unit and let stand for 1 h at room temperature.

#### *Washing away failure sequences and other impurities*

16. Loosen the gel that sticks to the bottom using a spatula.
17. Spin for ~15 sec to separate supernatant (if any) from gel.
18. Add ~250  $\mu$ l 20% NaOAc (or 10% piperidine), wait for ~3 min, and spin. Discard filtrate. Repeat 6 times.
19. Add ~250  $\mu$ l 5% Et<sub>3</sub>N, wait for ~3 min, and spin. Discard filtrate. Repeat 3 times.
20. Add ~250  $\mu$ l ddH<sub>2</sub>O, no wait, and spin. Discard filtrate.

#### *Cleave and extract full-length sequences*

21. Add minimum 80% AcOH to cover the gel (~100  $\mu$ l), wait for 5 min, spin. Repeat 3 times.
22. Add minimum ddH<sub>2</sub>O to cover gel (~100  $\mu$ l), wait for ~3 min, spin. Repeat 5 times.
23. Evaporate the combined filtrates to dryness.

#### *Precipitation (optional)*

24. Add 100  $\mu$ l (or less) conc. NH<sub>4</sub>OH into the tube. Cap, and vortex and spin to dissolve.
25. Add 900  $\mu$ l (or less, keep the v/v ratio of  $n$ BuOH/NH<sub>4</sub>OH at 9)  $n$ BuOH via a pipette. Close the cap.

26. Vortex the tube for ~20 sec and then centrifuge at ~14K for ~2 min.
27. Remove the supernatant with a pipette, evaporate residue solvents, the solid is pure ODN.
28. Add 49  $\mu$ l ddH<sub>2</sub>O. Vortex and spin briefly. Inject ~1  $\mu$ l into RP HPLC for purity. Divide peak area by that in step 12 (only work well when the peak is resolved by HPLC) for recovery yield.
29. Evaporate solution to dryness to recover ODN.

### Notes

- ODN purity is dependent on quality of synthesis, which is similar to trityl-on RP HPLC, fluororous affinity purification, RP cartridge purification, and other affinity purification techniques involving selective tagging of full-length sequences.
- The method cannot remove deletion sequences, therefore efficient capping and detritylation are important.
- The method cannot remove sequences grown from CPG directly instead of from the first nucleoside, therefore pre-capping CPG before synthesis may be desirable.
- The method cannot remove n+1 sequences. Therefore whenever possible, avoid over-extending coupling time because that may cause premature detritylation and generate n+1 sequences.
- We suggest using CPG with 2K Å pore size and pre-capping CPG before synthesis for 20 min for the synthesis of ODNs longer than 100-mer. For shorter ODNs, use standard conditions.
- If purification results are unsatisfactory, replacing reagents with fresh ones for ODN synthesis or heating the product in conc. NH<sub>4</sub>OH for additional deprotection will most likely solve the problem.
- The method cannot be used for the purification of ODNs that have 5'-modification. However, our catching failure sequences by polymerization method is suited to do this (*Open Org. Chem. J.*, **2014**, 8, 15-18).
